1 **Title page**

2 **Title:** Sterol-O acyltransferase 1 is inhibited by gga-miR-181a-5p and gga-miR-429-3p  
3 through the TGF $\beta$  pathway in endodermal epithelial cells of Japanese quail

4 **Short title:** microRNAs regulate SOAT1 in EECs

5

6 Han-Jen Lin<sup>1¶</sup>, Chiao-Wei Lin<sup>2&</sup>, Harry J. Mersmann<sup>1&</sup>, Shih-Torng Ding<sup>1,2\*</sup>.

7

8 ¶ 1st set of equal contributors.

9 & 2nd set of equal contributors, these authors also contributed equally to this work.

10 **\*Corresponding author:** Dr. Shih-Torng Ding ([sding@ntu.edu.tw](mailto:sding@ntu.edu.tw)).

11

12 <sup>1</sup>Department of Animal Science and Technology, National Taiwan University, Taipei City,  
13 Taiwan (R.O.C.).

14 <sup>2</sup>Institute of Biotechnology, National Taiwan University, Taipei City, Taiwan (R.O.C.).

15 **Mailing address:** No.50, Ln. 155, Sec. 3, Keelung Rd. Sec. 3, Taipei City 106, Taiwan  
16 (R.O.C.)

17 **Tel number:** +886-2-3366-4175

18 **Fax number:** +8862-2732-4070

## 19 **Abstract**

20       Nutrients are utilized and re-constructed by endodermal epithelial cells (EECs) in yolk  
21       sac membranes in avian species. Sterol-O acyltransferase 1 (SOAT1) is the key enzyme to  
22       convert cholesterol to cholesteryl ester for delivery to growing embryos. During  
23       development, absorption of yolk is matched with significant changes of SOAT1 mRNA  
24       and enzyme activity. miRNAs regulate angiogenesis and metabolism during mammalian  
25       development. However, the involvement of miRNAs in lipid utilization during avian  
26       embryogenesis remains ambiguous.

27       Using a miRNA sequencing technique, we found several candidate miRNAs and  
28       confirmed expression patterns with real time PCR. They were selected for as candidates  
29       targeting the receptor (TGF $\beta$  receptor type 1, TGFBR1) that may regulate SOAT1. Similar  
30       to SOAT1 mRNA accumulation, the gga-miR-181a-5p expression was gradually elevated  
31       during development, but the concentration of gga-miR-429-3p was in the opposite  
32       direction. Transfection with gga-miR-181a-5p or gga-miR-429-3p inhibited TGFBR1 and  
33       SOAT1 in EECs. The 3' untranslated region (3'UTR) of TGFBR1 was then confirmed to  
34       be one of the targets of gga-miR-181a-5p and gga-miR-429-3p. Taken together, expression  
35       of miRNAs during embryonic development regulates SOAT1 expression by inhibiting the  
36       3'UTR of TGFBR1. This is indicative of possible regulation of avian yolk lipid utilization

37 and modification of hatchability by changing miRNA expressions.

38

## 39 **Introduction**

40 SOAT1 (sterol-O acyltransferase 1), also named ACAT1 (acyl-Coenzyme A:  
41 cholesterol acyltransferase 1), is the key enzyme to catalyze cholesterol conversion into  
42 cholesteryl ester, by adding fatty acyl coenzyme A; thus, a less polar molecule is produced  
43 [1]. Yolk sac membrane (YSM), a three-layer extraembryonic tissue, serves crucial roles  
44 for avian embryos during the entirety of embryonic development. We demonstrated that  
45 SOAT1 activity in endodermal epithelial cells (EECs, the third layer of YSM) was  
46 activated by specific nutrients and hormones through the cAMP-dependent PKA signaling  
47 pathway, and accumulated more cholesterol ester in EECs [2].

48 The diversity of bio-functions and involvement of non-coding RNAs has raised  
49 considerable issues. Non-coding RNAs include short (microRNAs, miRNAs) and long  
50 non-coding (lncRNAs), ribosomal (rRNAs), transfer (tRNAs), small nuclear (snRNAs),  
51 small nucleolar (snoRNAs), transfer-messenger (tmRNAs) and telomerase RNAs [3]. The  
52 functions and regulations of miRNAs have been examined in mammalian species for  
53 decades. Mainly, mature miRNAs are paired to 3' untranslated regions (UTR) or 5'UTR  
54 by identifying seed regions of target genes [4].

55        During avian embryonic development, the comprehensive whole mount in situ  
56 hybridization expression analysis of 111 mature miRNA sequences in chicken embryos  
57 revealed that miRNAs showed a variety of patterns in the early stages of development [5].  
58 Tissue specific-expressed miRNAs were also found to regulate lipid metabolism and cell  
59 proliferation at later stages in chicken embryonic livers [6]. Some miRNAs were extracted  
60 and detected in albumen and yolk from chicken unembryonated eggs. This suggested that  
61 miRNA transport from laying hens into albumen or yolk would be efficient to facilitate  
62 normal embryonic development by continually supplying miRNAs to growing embryos  
63 during nutrient uptake [7]. Nutrient absorption and reassembly in YSM has been confirmed  
64 [2, 8]. However, the miRNA expression patterns of YSM and the crucial linkages between  
65 embryos and yolk remain unclear during development.

66        The TGF $\beta$  signaling pathway is substantial in development [9]. The TGF $\beta$  family is  
67 involved in paracrine signaling and can be found in different tissue types, including brain,  
68 heart, kidney, liver, and sex organs. TGF $\beta$  receptor types I and II have similar ligand-  
69 binding affinities and can only be distinguished by peptide mapping. Both receptor type I  
70 and II have high affinities for TGF $\beta$ 1, but low affinities with TGF $\beta$ 2. Overall activation of  
71 the TGF $\beta$  signaling pathway is through TGF family-ligand binding followed by continuous  
72 phosphorylation of the type I and then type II receptor. The Smad2/3 proteins, known as

73 signal transmitters, are phosphorylated after TGF $\beta$  receptor activation. Smad4 then joins  
74 with Smad2/3 to form the transcription factor complex to enter the nucleus and regulate  
75 promoter regions of target genes.

76 The relationships between SOAT1 and the TGF $\beta$  signaling pathway during lipid  
77 metabolism are less discussed. Although TGF $\beta$  alters cellular cholesterol metabolism in  
78 smooth muscle cells by increasing LDL receptor expression and simulating substrate  
79 binding (LDL), as well as enhancing delivery of cholesterol, the SOAT1 activity is not  
80 changed [10]. Similarly, TGF $\beta$  increases cholesterol efflux in macrophage-derived foam  
81 cells, but the SOAT1 mRNA expression (analyzed by Northern blotting) remains  
82 unchanged after TGF $\beta$  stimulation [11]. However, exogenous TGF $\beta$ 1 upregulates SOAT1  
83 expression and activity during transition of human monocytes into macrophages [12].  
84 TGFBR1 proteins are detected from early stages in chicken embryos [13]. Although the  
85 Smad3 transcription factor binding region in the SOAT1 promoter is predicted by  
86 Genomatix, the detailed mechanism of the TGF $\beta$  signaling pathway regulating SOAT1  
87 needs to be clarified.

88 In this study, we demonstrated the miRNA profiling and miRNA-mRNA interaction  
89 in primary EECs from YSM of Japanese quail. The aim of the current research was to  
90 discover potential miRNAs involved in the TGF $\beta$  signaling pathway and modulation of

91 SOAT1 expression in EECs during embryonic development.

92

## 93 **Material and methods**

94 All animal studies were approved by the Institutional Animal Care and Use Committee

95 (IACUC) of the National Taiwan University. The IACUC Approval No: NTU107-EL-

96 00148.

### 97 **microRNA sequencing**

98 The microRNA sequencing of yolk sac membranes (YSM) during Japanese quail (*Coturnix*

99 *coturnix*) embryonic development was analyzed by PhalanxBio Inc. (Hsinchu, Taiwan).

100 For a better understanding of the overall miRNA expression profiles, samples of YSM were

101 collected at embryonic day 5 (ED5), ED10, ED15, and post-hatch day 2 (PH2); one sample

102 was used at each time point. Total RNA was sequenced by Illumina HiSeq2500; raw data

103 was compared with references to a chicken microRNA database, miRBase v21, for

104 comparison of miRNA precursors and mature miRNA sequences.

105

### 106 **Prediction of microRNA targeting genes**

107 Two software programs were applied to predict the unknown chicken miRNAs targeting

108 SOAT1 and the potential targets of selected miRNAs. We searched for miRNA candidates

109 that affect SOAT1 and the transforming growth factor-beta signaling pathway (TGF $\beta$   
110 signaling pathway) using miRDB (<http://www.mirdb.org/miRDB/index.html>) [14, 15] and  
111 TargetScanHuman 7.2 ([http://www.targetscan.org/vert\\_72/](http://www.targetscan.org/vert_72/)) [16]. We confirmed the  
112 selected miRNAs with miRNA sequencing data. The sequences of selected miRNA are  
113 listed as Table 1. SMAD3 (SMAD family member 3, a family of proteins similar to the  
114 Drosophila gene 'mothers against decapentaplegic' (Mad) and the C. elegans gene Sma),  
115 was one of the main signal transducers in the TGF $\beta$  signaling pathway for the SMADs  
116 complex assembly and entrance into the nucleus. According to results of Genomatix  
117 prediction, the SMAD3 transcription factor binding site was present in the SOAT1  
118 promoter. Therefore, we hypothesized that the miRNAs affect both SOAT1 and factors in  
119 the TGF $\beta$  signaling pathway.

120

121 Table 1. The list of selected miRNAs.

| <b>Chicken miRNA ID</b> | <b>miRNA Sequences<br/>(5'→3')</b> | <b>Potential target<br/>sequences</b> | <b>Possible targets</b> |
|-------------------------|------------------------------------|---------------------------------------|-------------------------|
| gga-miR-7455-3p         | 5'-<br>CUUCCCUCCGU                 | 5'-<br>GTGTGCGCGCC                    | SMURF2, SOAT1           |

|                 |                                           |                                           |                                              |
|-----------------|-------------------------------------------|-------------------------------------------|----------------------------------------------|
|                 | CGGCGCGCACAC<br>C-3'                      | GACGGAGGGA<br>AG-3'                       |                                              |
| gga-miR-181a-5p | 5'-<br>AACAUUCAACG<br>CUGUCGGUGA<br>GU-3' | 5'-<br>ACTCACCGACA<br>GCGTTGAATGT<br>T-3' | TGFBR1,<br>TGFBRAP1, STRAP,<br>SMURF2, SOAT1 |
| gga-miR-199-3p  | 5'-<br>UACAGUAGUC<br>UGCACAUUGG-<br>3'    | 5'-<br>CCAATGTGCAG<br>ACTACTGTA-3'        | TAB2, TAB3,<br>TGIF, SOAT1                   |
| gga-miR-133a-5p | 5'-<br>AGCUGGUAAA<br>AUGGAACCAA<br>AUC-3' | 5'-<br>GATTTGGTTCC<br>ATTTTACCAGC<br>T-3' | TGFBR1, SOAT1                                |
| gga-miR-429-3p  | 5'-<br>UAAUACUGUC                         | 5'-<br>ACGGCATTACC                        | TGFBR1, SMURF2,<br>TAB3, SOAT1               |



|  |             |             |  |
|--|-------------|-------------|--|
|  | UGGUA AUGCC | AGACAGTATTA |  |
|  | GU-3'       | -3'         |  |

122 SMURF2= SMAD specific E3 ubiquitin protein ligases 2

123 STRAP= serine/threonine kinase receptor associated protein

124 TGFBR1, TGFBR2= transforming growth factor beta receptor 1 or 2

125 TGFBRAP1= TRAP1, transforming growth factor beta receptor associated protein 1

126 TAB2, TAB3= TGF-beta activated kinase 1 (MAP3K7) binding protein 2, 3

127 TGIF= TGFB induced factor homeobox 1, TG-interacting factor 1

128

## 129 **Validation of microRNA expressions in YSM tissues of Japanese**

### 130 **quail**

131 Total RNA of YSM tissues from four embryonic days were extracted by GENEzol™

132 Reagent (New Taipei City, Taiwan). The miRNAs were modified by polyadenylation at

133 the 3' end and then reverse transcribed into the cDNA of miRNA using the miScript PCR

134 Starter Kit (#218193, Qiagen, Valencia, CA, USA) with an oligo dT primer (with a

135 universal tag). The custom miScript Primer Assays (as forward primer, Table 2) were

136 designed to identify different miRNAs and miScript Universal Primer was used as reverse

137 primer. Real-time PCRs were analyzed by SensiFAST™ SYBR® Hi-ROX Kit (BIO-92020,

138 Bioline, London, UK). A PCR program was used as described: 15 minutes at 95°C, 40  
139 cycles of 15 seconds at 94°C for denaturation, 30 seconds at 55°C for primer annealing, 30  
140 seconds at 70°C for extension, and 1 minute at 70°C for final extension. All kits and primer  
141 assays were purchased from commercial sources and were used according to manufacturer  
142 instructions here and elsewhere in this manuscript.

143

144 Table 2. The miScript primer list.

| Forward primer name | Sequences               | Accession number on miRBase |
|---------------------|-------------------------|-----------------------------|
| gga-miR-7455-3p     | CTTCCCTCCGTCGGCGGCACAC  | MIMAT0029065                |
| gga-miR-181a-5p     | AACATTCAACGCTGTCGGTGAGT | MIMAT0001168                |
| gga-miR-181b-5p     | AACATTCATTGCTGTCGGTGGG  | MIMAT0001151                |
| gga-miR-199-3p      | TACAGTAGTCTGCACATTGG    | MIMAT0003721                |
| gga-miR-133a-5p     | AGCTGGTAAAATGGAACCAAATC | MIMAT0026509                |
| gga-miR-200a-3p     | TAACACTGTCTGGTAACGATGT  | MIMAT0001171                |
| gga-miR-429-3p      | TAATACTGTCTGGTAATGCCGT  | MIMAT0003371                |
| Internal control of | As forward primer,      | 18S ribosomal RNA           |

|       |                     |                               |
|-------|---------------------|-------------------------------|
| miRNA | CCGAGGCGCCUCGGUGGGC | gene (GenBank:<br>KT445934.2) |
|-------|---------------------|-------------------------------|

145 \*The reverse primer is obtained from miScript II RT Kit 10× miScript Universal Primer  
146 (Qiagen).

147

## 148 **Cell culture system**

149 Isolation of endodermal epithelial cells (EECs) and the culture system were modified from  
150 the published procedure [8]. In short, YSM tissues from day 5 embryos were treated with  
151 collagenase (collagenase type 4, 17104019, ThermoFisher, Waltham, MA, USA) to  
152 partially digest the extracellular matrix and facilitate cell isolation [17]. We collected six  
153 YSM (from six embryonic day five embryos) to isolate EECs; these were pooled as one  
154 sample for the experiment. EECs were cultured in DMEM/ F12 (pH 7.4, 12400–024,  
155 ThermoFisher) with 10% new born calf serum (16010–159, ThermoFisher) and 1%  
156 Penicillin-Streptomycin-Amphotericin B Solution (PSA, 03-033-1B, Biological Industries,  
157 Cromwell, CT, USA).

158 To emphasize functional effects, selected miRNAs were transiently transfected into EECs  
159 after seeding for 48 hours. The culture medium was changed before transfection. The  
160 transfection complexes were prepared with 5 nM miRNA mimics or a 5 nM siRNA

161 negative control (AllStars Negative Control siRNA, 5'-UUCUCCGAACGUGUCACGU-  
162 3') in DMEM/F12 using 3  $\mu$ L HiPerFect<sup>®</sup> Transfection Reagent. The custom miScript  
163 miRNA mimics, negative control, and HiPerFect<sup>®</sup> Transfection Reagent were purchased  
164 from a commercial source (Qiagen).

165 The HEK293T cell line was used for validation of the target pairing between miRNAs and  
166 target sequences by the luciferase reporter assay. The 293T cells were cultured in DMEM  
167 (pH 7.4, 12800-017, ThermoFisher) with 10% fetal bovine serum (SH30071.02, GE  
168 Healthcare Life Sciences, Utah, USA) and 1% PSA.

169

## 170 **Real time PCR for measuring gene mRNA accumulations**

171 The total RNA of YSM tissues or EECs was extracted using the GENEzol<sup>™</sup> Reagent (New  
172 Taipei City, Taiwan), followed by reverse transcription with a High Capacity cDNA  
173 Reverse Transcription Kit (4368814, ThermoFisher). The cDNA was stored at -20°C. The  
174 specific primers for quail gene expressions were designed by Primer3  
175 (<http://frodo.wi.mit.edu/primer3/>) and listed below (Table 3). The reactions were prepared  
176 using a SensiFAST<sup>™</sup> SYBR<sup>®</sup> Hi-ROX Kit and 0.3  $\mu$ M specific primers. The program used  
177 was: 3 minutes at 95°C, 40 cycles of 5 seconds at 95°C and 30 seconds at 60°C for  
178 annealing, with final extension for 1 minute at 60°C.

179

180 Table 3. The Real time-PCR primers

| Primer                           | Source         | Sequences             |
|----------------------------------|----------------|-----------------------|
| Gallus- $\beta$ -actin-151 bp-1s | XM_015876619.1 | TGGTGAAGCTGTAGCCTCTC  |
| Gallus- $\beta$ -actin-151 bp-1a |                | GTGATGGACTCTGGTGATGG  |
| Quail-SOAT1-186bp-1s             | XM_015869745.1 | CATCCTTAATGACCGCCGGA  |
| Quail-SOAT1-186bp-1a             |                | ATCTGCACGTGACATGACCA  |
| Quail-TGFBRAP1-156 bp-1s         | XM_015849926.1 | TCTGTTTCCCTACTGCAGCG  |
| Quail-TGFBRAP1-156 bp-1a         |                | CCAATCACGTTCTCCGACCA  |
| Quail-TGFBR1-154 bp-1s           | XM_015854836.1 | G TTCAGGACCGGACTATGGC |
| Quail-TGFBR1-154 bp-1a           |                | GCCCATCTGT CACACAGGTA |
| Quail-TGFBR2-129 bp-1s           | XM_015853978.1 | GAGAACATCCCTGCGTGGAA  |
| Quail-TGFBR2-129 bp-1a           |                | CCCAGCACTCGATAAGGGTC  |
| Quail-STRAP-128 bp-1s            | XM_015867774.1 | ACCCCTTACGGCTACTTCCT  |
| Quail-STRAP-128 bp-1a            |                | TTCAACGTAGCACCCCAGAC  |
| Quail-SMURF2-103 bp-1s           | XM_015879567.1 | ACATGTCCAACCAAGGGGC   |
| Quail-SMURF2-103 bp-1a           |                | TCAGGAAGTCGGAAAAAGTCC |

|                       |                |                      |
|-----------------------|----------------|----------------------|
| Quail-TGFB2-146 bp-1s | XM_015857278.1 | CAGTGGGAAGACCCACATC  |
| Quail-TGFB2-146 bp-1a |                | AAAGTGGACGTAGGCAGCAA |
| Quail-TGIF-124 bp-1s  | XM_015855362.1 | CCCAAAGAGTCCGTGCAGAT |
| Quail-TGIF-124 bp-1a  |                | TGCAGACCTGTAGTGTGGAG |

181

## 182 **Luciferase plasmid construction and luciferase reporter assay**

183 To verify the miRNA-mRNA pairing between miRNAs and 3'UTR of chicken  
184 transforming growth factor beta receptor 1 (TGFB1, NM\_204246.1), the synthetic WT  
185 sequences of the 3'UTR (Genomics, New Taipei City, Taiwan) were amplified and cloned  
186 into a pmirGLO Dual-Luciferase miRNA Target Expression Vector (E1330, Promega,  
187 Madison, WI, USA) at SacI and XhoI restriction sites. The primers used for amplifying the  
188 mutated sequence are listed as Table 4. The 3' UTR of TGFB1 was predicted to contain  
189 two gga-miR-181a-5p binding sites and 1 gga-miR-429-3p binding site. Therefore, the  
190 synthetic mutants of TGFB1 3'UTR were separately inserted into pmirGLO vectors.  
191 The pmirGLO-mutant-3'UTR plasmids, which had two 7 bp substitutions in the seeding  
192 regions of miR-181a-5p (MUs: TTGAATG→GGTCCGT), and one 7 bp substitution in  
193 the seeding region of miR-429-3p (MU: TAATACT→GCGCGCG) were all sequenced.

194

195 Table 4. Primers for synthetic 3'UTR amplification.

| Primers                           | Sequences                                 | Product size (bp) |
|-----------------------------------|-------------------------------------------|-------------------|
| SacI-synTGFBR1-<br>3'UTR-1s-593bp | 5'-<br>TAAAGAGCTCTCCTGGATTTGCAACCAAAAA-3' | 593               |
| XhoI-chTGFBR1-<br>3'UTR-1a        | 5'-GAAGCTCGAGATAGTTGCATAATTTATGTT-<br>3'  |                   |

196

197 The 293T cells at a density of  $3 \times 10^4$  cells/ well on 96-well plates were cultured in DMEM  
198 medium with 10% fetal bovine serum and 1% PSA. When the cells reached 60% to 70%  
199 confluence, pmirGLO-syn-3'UTR (100 ng) or pmirGLO-syn-mu-3'UTR-181a-5ps (100 ng)  
200 or pmirGLO-syn-mu-3'UTR-429-3p (100 ng) were co-transfected with a negative siRNA  
201 control or 5 to 15 nM gga-miR-181a-5p, gga-miR-199-3p, gga-133a-5p, or gga-miR-429-  
202 3p mimics (Qiagen) using 0.65  $\mu$ L of PolyJet™ (SL100688, SignaGen® Laboratories,  
203 Rockville, MD, USA). The luciferase expression was measured by the Dual-Glo Luciferase  
204 Assay System (Promega) after transfections for 24 hours, and was detected by SpectraMax  
205 i3 and SoftMax Pro 7.0 (Molecular Devices, San Jose, CA, USA).

206

## 207 **SDS-polyacrylamide gel electrophoresis and immunoblotting**

208 EECs were transfected by GenMute™ siRNA Transfection Reagent (SL100568,  
209 SignaGen® Laboratories) after culturing for 48 hours. Total protein of EECs was extracted  
210 with 1X RIPA buffer (20–188, Merck, Darmstadt, Germany), supplemented with Halt™  
211 Proteinase & Phosphatase Single-Use inhibitor cocktail (78442, ThermoFisher). Total  
212 proteins were collected by and centrifugation procedure (17000 g at 4°C for 30 minutes) to  
213 remove mitochondria, cell membranes, nucleus and others. The supernate was stored in -  
214 80°C for Western blotting following the previously described procedure (2). In brief, 15 µg  
215 protein/ per sample as determined using the Pierce™ BCA Protein Assay kit (23227,  
216 ThermoFisher) were subjected to 10% SDS-PAGE gel with 80V for 130 minutes, and the  
217 separated proteins were electrophoretically transferred to a polyvinylidene difluoride  
218 (PVDF) membranes (NEF1002001PK, PerkinElmer, Waltham, MA, USA) by 400 mA for  
219 75 minutes. Nonspecific binding sites were blocked with 5% skim milk for 1 hour at room  
220 temperature. SOAT1 was detected with rabbit anti-mouse SOAT1 primary antibody  
221 (antibody diluted 1:300, orb100781, Biorbyt, Cambridgeshire, UK) followed by incubation  
222 with anti-rabbit IgG HRP-linked secondary antibody (1:5000, 7074S, Cell Signaling,  
223 Danvers, MA, USA). TGFBR1 was detected with rat anti-mouse TGFBR1 primary  
224 antibody (1:300, sc-101574, Santa Cruz, Dallas, Texas, USA) and followed by incubation



225 with anti-rat IgG HRP-linked secondary antibody (1:5000, bs-0293G-HRP, Bioss, Woburn,  
226 MA, USA). The  $\beta$ -actin protein (1:1000, sc-4778, Santa Cruz) was detected as an internal  
227 control. The target proteins were detected with the Clarity™ Western ECL Blotting  
228 Substrate (#170-5061, Bio-Rad, Hercules, CA, USA). The sizes of proteins were estimated  
229 with a PageRuler™ Prestained Protein Ladder (10-180 kDa) (26616LCS, ThermoFisher).  
230 Protein quantifications were performed with Bio-Rad ChemiDoc Touch Imaging program.

231

## 232 **Statistical analysis**

233 All data were analyzed by one-way analysis of variance. The major effect between  
234 treatments was determined by Dunnett's multiple comparison post-hoc test. The  
235 significance level used was at  $P \leq 0.05$ .

236

## 237 **Results**

### 238 **The discovery of candidate miRNAs involving in SOAT1** 239 **regulation during embryonic development**

240 The aim was to find potential miRNAs for direct or indirect modulation of SOAT1  
241 expression. The miRNA database for Japanese quail was not yet available, therefore, we  
242 used the database from chickens (*Gallus gallus*). The miRNA lengths were mostly

243 concentrated at 22 bps (Fig 1A), and the clustering analysis showed (Fig 1B) that there  
244 were 30 miRNAs with the most variance among the four developmental time points. To  
245 clarify the regulation of SOAT1, two online searching tools, miRDB  
246 (<http://www.mirdb.org/miRDB/>) and TargetScanHuman 7.2  
247 ([http://www.targetscan.org/vert\\_72/](http://www.targetscan.org/vert_72/)) were used to find potential miRNAs targeting  
248 SOAT1. These predictions were further confirmed by miRNA sequencing data.

249 Seven miRNAs were selected and listed according to the scoring by miRDB (Table  
250 1). The higher scores indicated the more confidence in prediction algorithm. They also  
251 showed expression patterns according to miRNA sequencing (Fig 1C). Expressions of  
252 miRNAs were further verified by real-time PCR on YSM samples (Fig 1D). The seven  
253 miRNAs were gga-miR-7455-3p (MIMAT0029065; prediction score-94), gga-miR-181a-  
254 5p (MIMAT0001168; score-88), gga-miR-181b-5p (MIMAT0001151; score-88), gga-  
255 miR-199-3p (MIMAT0003721; score-81), gga-miR-133a-5p (MIMAT0026509; score-80),  
256 gga-miR-200a-3p (MIMAT0001171; score-73), and gga-miR-429-3p (MIMAT0003371;  
257 score-71).

258

259 Fig 1. Specific miRNA expressions during embryonic development of Japanese quail. Embryonic  
260 day was as ED, and post-hatch day was as PH.

261 (A) Base pair length of miRNAs; the most frequent appearance of miRNAs was at 22 bp.

262 (B) Cluster analysis of miRNA sequencing. Clustering was performed to visualize the correlations  
263 among the replicates and varying sample conditions. A subset of microRNAs that exhibited the  
264 most variance was selected for cluster analysis. The number of microRNAs clustered was 250.

265 (C) The sequencing data set for gga-miR-7455-3p, gga-miR-181a-5p, gga-miR-181b-5p, gga-miR-  
266 199-3p, gga-miR-133a-5p, gga-miR-200a-3p, and gga-miR-429-3p. One sample was used at  
267 every time-point in the sequencing result.

268 (D) Confirmation of miRNA expressions by real-time PCR. Every point included seven to nine  
269 samples per group. Data were expressed as mean  $\pm$  S.E.M. Statistical significance was  
270 determined by one-way analysis of variance. Dunnett's multiple comparison test was used to  
271 evaluate differences between means. A significant difference from ED5 samples was indicated  
272 as \* $P \leq 0.05$ , \*\* $P \leq 0.01$ , \*\*\* $P \leq 0.005$  or \*\*\*\* $P \leq 0.001$ .

273

274 Because we only collected and analyzed one sample at each timepoint to sequence,  
275 the correlations between miRNA sequencing and real-time PCR were calculated. The  
276 results showed that the most similarity between the 7 miRNAs was with gga-miR-429-3p  
277 (about 83%), gga-miR-199-3p (61%), and gga-miR-181a-5p (50%) (Fig 2).

278

279 Fig 2. The correlations between sequencing and real-time PCR of gga-7455-3p, gga-miR-181a-5p,  
280 gga-miR-181b-5p, gga-miR-199-3p, gga-miR-133a-5p, gga-miR-200a-3p, gga-miR-429-3p. The  
281 blue lines indicated the miRNA sequencing patterns, the blue dotted lines indicated the regression  
282 lines of the sequencing data, the orange lines indicated real-time PCR results and the orange dotted  
283 lines indicated regression lines of the real-time PCR data.

284

## 285 **The potential functions of selected miRNAs on regulations of** 286 **SOAT1 and TGF $\beta$ signaling pathway**

287 We used the *ex vivo* culture system with EECs from Japanese quail YSMs, to study  
288 the effects of selected miRNAs. Total RNA was extracted and analyzed after transient  
289 transfection for 48 or 72 hours. The results at 48 hours showed that SOAT1 expressions  
290 were decreased by gga-miR-133a-5p and by gga-miR-429-3p; furthermore, TGFBR1  
291 expressions were inhibited by gga-miR-133a-5p and gga-miR-429-3p. TGFBRAP1  
292 (transforming growth factor-beta receptor associated protein 1) is a specific chaperone for  
293 Smad4 to bring Smad4 to phosphorylated Smad2/3 and to facilitate formation of the SMAD  
294 complex [18]. STRAP (serine/threonine kinase receptor associated protein) is present in a  
295 complex with Smad7 and activated TGFBR1 to stabilize the complex, and further inhibit  
296 the TGF $\beta$  signaling by preventing Smad2/Smad3 access to the receptor [19]. SMURF2

297 (SMAD specific E3 ubiquitin protein ligases 2) is an E3 ubiquitin ligase and can be  
298 recruited by Smad7 to form a complex to degrade TGFBR1 [20, 21].

299 Although the miRNAs were predicted to target genes mentioned above, expressions of  
300 TGFBRAP1, STRAP, and SMURF2 remained unchanged after transfection (Fig 3).

301 Despite the inhibition by gga-miR-133a-5p of TGFBR1, there was no effect on SOAT1  
302 after 72 hours transfection (data not shown). TGFBR1 is one of the receptors for the TGF $\beta$   
303 signaling pathway. TGFBR1 is activated and phosphorylated when TGFBR2 receives  
304 ligands (e.g., TGF $\beta$ 1). The downstream signals in the TGF $\beta$  signaling pathway, Smad2 and  
305 Smad3 are then phosphorylated by TGFBR1. The phosphorylated Smad2/3 joins with  
306 Smad4 to form the Smad complex and enters the nucleus for pairing with the transcription  
307 factor binding region. Furthermore, the co-repressor (e.g., TGIF) or co-activator (e.g.,  
308 CBP/p300) attaches to the complex and affects the regulations of target genes.

309

310 Fig 3. Target gene expressions after transient transfection for 48 hours using selected miRNAs.

311 Potential target gene expressions of miRNAs transfection after 48 hours were analyzed by real-  
312 time PCR. C = control group with no transfection; NC = negative control group, the group of  
313 transfections with AllStars Negative Control siRNA. Others = groups of miRNAs transfections (5  
314 nM miRNA mimics). N= seven to eight per group. Data were expressed as mean  $\pm$  S.E.M. Control

315 value was set as 1. All groups were compared with NC groups. Statistical significance was  
316 determined by one-way ANOVA. Dunnett's multiple comparisons test was used to evaluate  
317 differences between means (\* $P \leq 0.05$ ).

318

### 319 **The validations of selected miRNAs pairing ability to the** 320 **chicken TGFBR1 3'UTR**

321 To confirm the newly-found miRNA pairing abilities to 3'UTR of the target gene,  
322 chicken TGFBR1, we constructed wild-type 3'UTR sequences of chicken TGFBR1 linked  
323 to the luciferase expression vector (Fig 4A). After co-transfection of miRNA mimics and  
324 WT-3'UTR pmirGLO plasmids into the 293T cells, the relative luciferase expressions were  
325 decreased by both gga-miR-181a-5p and gga-miR-429-3p. There was no decrease by  
326 gga-miR-133a-5p or gga-miR-199-3p (Fig 4B). The results suggested that gga-miR-181a-  
327 5p and gga-miR-429-3p target and pair with the TGFBR1 3'UTR to inhibit TGFBR1  
328 mRNA accumulation in cells. The data also suggested that gga-miR-133a-5p may not pair  
329 with TGFBR1 3'UTR or pair outside the seed region or through other target genes to  
330 repress TGFBR1 expression in cells.

331

332 Fig 4. The validations of selected miRNAs to chicken TGFBR1 3'UTR.

333 (A) The scheme of the constructed luciferase plasmid.

334 (B) The relative luciferase expressions after miRNA mimic transfection. Transient transfection was  
335 conducted on 293T cells ( $3 \times 10^4$  cells/ well). The pmirGLO-WT-3'UTR plasmid (100 ng) was  
336 used, and co-treated with 5 nM miRNA mimics or siRNA (negative control, NC). Firefly and  
337 Renilla luminescence were detected after transfection for 24 hours. N= nine per group. Data  
338 were expressed as mean  $\pm$  S.E.M. Transfection with pmirGLO-WT-3'UTR only was set as 1.  
339 All groups were compared with NC groups. Statistical significance was determined by one-  
340 way ANOVA. Dunnett's multiple comparisons test was used to evaluate differences between  
341 means (\* $P \leq 0.05$ ).

342 (C) The sequence alignment of gga-miR-181a-5p and gga-miR-429-3p with the binding sites of the  
343 chicken TGFBR1 3'UTR.

344

345 In order to clarify the conflict between gga-miR-181a-5p transfection on gene  
346 expressions and pairing ability validation, EECs were then further transfected with  
347 different miRNA concentrations. The result showed that both SOAT1 and TGFBR1 were  
348 inhibited by 15 nM miRNA (Fig 5). Therefore, TGFBR1 expression was also regulated by  
349 gga-miR-181a-5p and gga-miR-429-3p to affect SOAT1 mRNA expression in EECs.

350

351 Fig 5. Target gene expressions after transient transfection for 48 hours using gga-miR-181a-5p or  
352 gga-miR-429-3p. The expressions of SOAT1 and TGFBR1 were analyzed by real-time PCR after  
353 48 hours of miRNAs transfection. Data were expressed as mean  $\pm$  S.E.M. N= nine per group.  
354 Control group was set as 1. All groups were compared with NC groups. Statistical significance was  
355 determined by one-way ANOVA. Dunnett's multiple comparisons test was used to evaluate  
356 differences between means (\* $P \leq 0.05$ ).

357

### 358 **Verification of interactions between selected miRNAs and the** 359 **3'UTR of TGFBR1**

360 The miRNA pairing activities were then further compared between the WT and the  
361 mutated 3'UTR sequences of chicken TGFBR1 (Fig 6A). To determine whether the  
362 predicted seed region of gga-miR-181a-5p and gga-miR-429-3p were true binding sites,  
363 the mutated- and WT 3'UTR of TGFBR1 were separately constructed into luciferase  
364 vectors. After transfection for 48 hours, there was no difference between WT and the  
365 seeding region mutation groups with co-transfected miRNA mimics (both gga-miR-181a-  
366 5p and gga-miR-429-3p) (Fig 6B). The data revealed that gga-miR-181a-5p and gga-miR-  
367 429-3p inhibited TGFBR1 and SOAT1 mRNA expressions by directly targeting TGFBR1  
368 3'UTR.



369

370 Fig 6. TGFBR1 is one of the direct target gene of gga-miR-181a-5p and gga-miR-429-3p. The  
371 relative luciferase expressions after miRNA mimics transfection.

372 (A) Scheme of potential binding sites of gga-miR-181a-5p and gga-miR-429-3p on the wild- or  
373 mutated-type of chicken TGFBR1 3'UTR.

374 (B) The transient transfection was conducted on 293T cells ( $3 \times 10^4$  cells/ well). The pmirGLO-WT-  
375 3'UTR plasmid and pmirGLO-MU-3'UTR plasmid (100 ng/ well) were used and co-treated  
376 with 5 nM miRNA mimics. siRNA served as the negative control (NC). Firefly and Renilla  
377 luminescence were detected after transfection for 24 hours. N=10 to 14 per group. Data were  
378 expressed as mean  $\pm$  S.E.M. All groups were compared with the NC group. Statistical  
379 significance was determined by one-way ANOVA. Dunnett's multiple comparison test was  
380 used to evaluate differences between means. A significant difference (\* $P \leq 0.05$  or \*\* $P \leq 0.01$ )  
381 was indicated.

382

383 **SOAT1 was regulated by gga-miR-181a-5p and gga-miR-429-3p**  
384 **by modulating TGFBR1 in the TGF $\beta$  signaling pathway**

385 Protein concentrations of SOAT1 and TGFBR1 were examined after confirmation of  
386 two miRNAs pairing activity. Not only the mRNA accumulations were inhibited, but also

387 both protein expression levels were found decreased after miRNAs mimic transfection for  
388 48 hours (Fig 7), suggesting that the inhibitory effects of miRNAs were effective and  
389 consistent in EECs.

390

391 Fig 7. The SOAT1 and TGFBR1 protein levels after transfections with gga-miR-181a-5p or gga-  
392 miR-429-3p. EECs were transfected by miRNAs mimic for 48 hours and extracted for western  
393 blotting analysis. Total density of SOAT1 or TGFBR1 were normalized by total density of  $\beta$ -actin.  
394 Data were expressed as mean  $\pm$  S.E.M. N = five to nine per group. C = group of no transfection in  
395 EECs, Mock = group of transfections with reagent only, NC = negative control group, the group of  
396 transfections with AllStars Negative Control siRNA. Others = groups of miRNAs transfections (5  
397 nM or 30 nM miRNA mimics). Control group was set as 1. All groups were compared with NC  
398 groups. Statistical significance was determined by one-way ANOVA. Dunnett's multiple  
399 comparison test was used to evaluate differences between means. A significant difference (\* $P \leq 0.05$   
400 or \*\* $P \leq 0.01$ ) was indicated.

401

402 Taken together, the direct pairing ability of gga-miR-181a-5p and gga-miR-429-3p on  
403 TGFBR1 3'UTR were verified by dual-luciferase assay. The expression of TGFBR1 was  
404 directly targeted and attenuated by gga-miR-181a-5p and gga-miR-429-3p; therefore, the

405 TGF $\beta$  pathway was affected by miRNAs, and SOAT1 mRNA and protein levels or activity  
406 was decreased. The process of cholesterol esterification was altered by miRNAs. Hence,  
407 for improving avian yolk lipid regulation to enhance hatchability during embryogenesis, it  
408 is very important to understand the involvement of miRNAs and miRNA expressions  
409 profiles in embryonic development.

410

## 411 **Discussions**

412 The major findings of this study are that gga-miR-181a-5p and gga-miR-429-3p both  
413 had miRNA-mRNA interactions with TGFBR1 to produce inhibitory effects on TGFBR1  
414 expression and regulate the TGF $\beta$  signaling pathway. In addition, the miRNAs inhibit  
415 downstream target gene expression, such as SOAT1 in EECs of Japanese quail. The pairing  
416 ability of two miRNAs to the complementary 3'UTR of chicken TGFBR1 was validated  
417 and confirmed by the dual-luciferase reporter assay. The EECs are responsible for dynamic  
418 absorption of lipids from yolk during avian embryonic development. The miRNA  
419 sequencing of YSMs revealed the miRNAs involvement during avian development. We  
420 demonstrated that SOAT1 is not only activated by a cAMP-dependent pathway [2], but  
421 also was modulated by the TGF $\beta$  signaling pathway. The current study was the first to  
422 provide direct evidence to demonstrate miRNA expression profiling in the developing

423 YSM of avian species.

424 The miRNAs are highly conserved among species. Gga-miR-181a-5p shares  
425 homology with human, mouse and zebrafish, and gga-miR-429-3p is homologous with the  
426 mouse. The very first revelation of miRNA expression patterns in avian species is by whole  
427 mount in situ hybridization from the early stages, such as ED0.5 to ED5 of chicken  
428 embryogenesis [5]. This information is further expanded by miRNA sequencing for the  
429 middle stages (ED5 to ED9, and ED11) of chicken embryogenesis [22, 23]. The miRNA  
430 patterns of chicken embryonic liver or muscle of middle and later stages are also profiled  
431 and predicted to be involved in hepatocyte proliferation/lipid metabolic pathways and to  
432 regulate muscle development [6, 24]. Nonetheless, the miRNA profiling in the  
433 extraembryonic tissues such as yolk sac membranes, are less discussed during  
434 embryogenesis in avian species.

435 The family of miR-181a contains four members (miR-181a/b/c/d) [25]. MiR-181a-5p  
436 has been proved to have multiple functions. In dendritic cells, miR-181a-5p reduces the  
437 immunoinflammatory response from oxidized LDL in atherosclerosis by targeting the pro-  
438 inflammatory transcription factor, c-Fos [26]. In preadipocytes, miR-181a-5p induces  
439 adipogenesis by decreasing endogenous TNF $\alpha$  [27], or further reduces cell proliferation  
440 through the TGF $\beta$  and the Wnt signaling pathway by directly targeting Smad7 and Tcf712

441 [28]. The latest results from porcine adipose tissues indicate that miR-181a-5p directly  
442 targets TGFBR1 and enhances preadipocyte differentiation via PPAR $\gamma$  activation [29]. In  
443 avian species, gga-miR-181a-5p inhibits proliferation of Marek's disease lymphoma cells  
444 by targeting MYBL1 protein [30]. High concentrations of gga-miR-181a-5p are present in  
445 the young chicken preadipocytes [31]. The circulating miR-181a-5p concentration is found  
446 low and with negative correlations in plasma triglyceride and cholesterol in  
447 hypertriglyceridemia patients. Therefore, miR-181a-5p is identified as one of the potential  
448 downregulated indicators for hypertriglyceridemia [32]. According to our results and those  
449 of prior studies, data strongly supports the involvement of gga-miR-181a-5p and the  
450 regulation of TGFBR1.

451 MiR-429s belong to the miR-200 family of microRNAs. MiR-429-3p has the potential  
452 to inhibit the Wnt signaling pathway and regulates adipogenesis through FABP4 activation  
453 [33]. Hsa-miR-429 inhibits epithelial–mesenchymal transition by targeting Onecut2 in  
454 colorectal carcinoma [34] and suppresses migration and invasion of a breast cancer cell  
455 line [35]. In the neurodegenerative disease aspects, levels of mmu-miR-429-3p in forebrain  
456 regions decrease in abundance at the clinical endpoint of prion disease [36]. The massive  
457 accumulation of cholesteryl ester is observed in forebrain regions from mouse models or  
458 in patients with Alzheimer's disease (AD) [37, 38], implying that SOAT1 is actively

459 involved in amyloid- $\beta$  synthesis and AD formation. SOAT1 is one of the targets that may  
460 have beneficial effects on AD when blocked [39], and we speculate miR-429-3p may have  
461 potential relationships associated with AD.

462 In addition to the SOAT1 involvement in avian embryogenesis, one of the common  
463 diseases that SOAT1 may contribute to is atherosclerosis. For many years,  
464 atherosclerosis has been attributed to abnormalities in cellular cholesterol homeostasis,  
465 especially in the formation of macrophage-derived foam cells [40]. One of the cytokines  
466 known to participate in monocyte-macrophage differentiation, TGF $\beta$ 1 increases SOAT1  
467 mRNA levels in human macrophages [12]. In macrophage-derived foam cells, miR-9-5p  
468 is found to target human SOAT1 mRNA 3'UTR and to reduce SOAT1 protein levels, but  
469 not SOAT1 mRNA levels [41]. Another study shows that miR-467b directly targets mouse  
470 SOAT1 3'UTR to regulate SOAT1 and cholesteryl ester formation [42]. However, the  
471 sequences of SOAT1 3'UTR from chicken or quail are not decoded, therefore, we explored  
472 the potential upstream pathway to affect SOAT1.

473 According to the real-time PCR results for two different miRNAs, gga-miR-181a-5p  
474 and gga-miR-429-3p, we demonstrated that an increase in gga-miR-181a-5p levels during  
475 development of Japanese quail. In contrary to gga-miR-181a-5p levels, gga-miR-429-3p  
476 were shown decrease during the developmental process. However, we confirmed the

477 SOAT1 and TGFBR1 inhibitions from two miRNA by EECs primary culture system.  
478 Therefore, the exact participation of gga-miR-181a-5p and gga-miR-429-3p in  
479 embryogenesis requires further examination.

480 The overall scheme of predicted regulation of miRNAs and the TGF $\beta$  signaling  
481 pathway with SOAT1 is illustrated in Fig 8. Taken together, embryonic SOAT1 expression  
482 in YSM was regulated by gga-miR-181a-5p and gga-miR-429-3p via the TGF $\beta$  signaling  
483 pathway, and TGFBR1 was the direct object of two miRNAs in Japanese quail. The current  
484 research found the first indication of possible regulation mechanism of avian yolk lipid  
485 utilization and modification of hatchability through changing YSM gga-miR-181a-5p and  
486 gga-miR-429-3p expressions during embryonic development.

487

488 Fig 8. The possible relationship between miRNAs, TGF $\beta$  signaling pathway and SOAT1  
489 expressions. The TGF $\beta$  signaling pathway is activated when the ligand (e.g., TGF $\beta$ 1) binds to  
490 TGFBR2, TGFBR2 phosphorylates TGFBR1. The signal transmitter Smad2/3 is phosphorylated  
491 by TGFBR1 and joins with phosphorylated Smad4 to form SMAD complex in cytoplasm. The  
492 SMAD complex then enters nucleus to target to transcription factor binding site to affect SOAT1  
493 gene expression. However, the gga-miR-181a-5p and gga-miR-429-3p both have the inhibitory  
494 ability on TGFBR1, and then decrease the SOAT1 expression. Although the gga-miR-133a-5p is

495 found to attenuate SOAT1 expression, the effect is independent of the TGF $\beta$  signaling pathway.

496

## 497 **Conclusions**

498 The expression profiles and involvements of miRNAs in the YSM of avian species  
499 were first demonstrated by microRNA sequencing technique. We further examined the  
500 biofunctions of gga-miR-7455-3p, gga-miR-181a-5p, gga-miR-199-3p, gga-miR-133a-5p,  
501 and gga-miR-429-3p using EECs primary culture system, and revealed the SOAT1 activity  
502 was attenuated by gga-miR-181a-5p and gga-miR-429-3p through directly inhibiting  
503 TGFBR1 in the TGF $\beta$  signaling pathway. This was indicative of possible regulations of  
504 avian yolk lipid utilization and modification of hatchability by changing predicted miRNA  
505 expressions.

506

## 507 **Acknowledgements**

508 This work was supported by the Ministry of Science and Technology, under Grant  
509 MOST 107-2313- B-002-050-MY3 in Taiwan. We especially thank the Technology  
510 Commons, College of Life Science, National Taiwan University for technical assistance  
511 on using the SpectraMax i3x Multi-Mode Plate Reader and the ultracentrifugation. We  
512 declare that the experiments comply with the current Taiwan laws, the place in which the



513 experiments were performed. There is no conflict of interest.

514

## 515 **References**

- 516 1. Chang TY, Chang CC, Cheng D. Acyl-coenzyme A:cholesterol acyltransferase. *Annu*  
517 *Rev Biochem.* 1997; 66:613-638. doi: 10.1146/annurev.biochem.66.1.613
- 518 2. Wang SH, Lin HJ, Lin YY, Chen YJ, Pan YH, Tung CT, et al. Embryonic cholesterol  
519 esterification is regulated by a cyclic AMP-dependent pathway in yolk sac membrane-  
520 derived endodermal epithelial cells. *PLoS ONE.* 2017; 12(11):e0187560. doi:  
521 10.1371/journal.pone.0187560
- 522 3. Morceau F, Chateauvieux S, Gaigneaux A, Dicato M, Diederich M. Long and short  
523 non-coding RNAs as regulators of hematopoietic differentiation. *Int J Mol Sci.* 2013;  
524 14(7):14744-14770. doi: 10.3390/ijms140714744
- 525 4. Kertesz M, Iovino N, Unnerstall U, Gaul U, Segal E. The role of site accessibility in  
526 microRNA target recognition. *Nat Genet.* 2007; 39(10):1278-1284. doi:  
527 10.1038/ng2135
- 528 5. Darnell DK, Kaur S, Stanislaw S, Konieczka JH, Yatskievych TA, Antin PB.  
529 MicroRNA expression during chick embryo development. *Dev Dyn.* 2006;  
530 235(11):3156-3165. doi: 10.1002/dvdy.20956

- 531 6. Hicks JA, Trakooljul N, Liu HC. Discovery of chicken microRNAs associated with  
532 lipogenesis and cell proliferation. *Physiol Genomics*. 2010; 41(2):185-193. doi:  
533 10.1152/physiolgenomics.00156.2009
- 534 7. Wade B, Cummins M, Keyburn A, Crowley TM. Isolation and detection of microRNA  
535 from the egg of chickens. *BMC Res Notes*. 2016; 9:283. doi: 10.1186/s13104-016-  
536 2084-5
- 537 8. Bauer R, Plieschnig JA, Finkes T, Riegler B, Hermann M, Schneider WJ. The  
538 developing chicken yolk sac acquires nutrient transport competence by an orchestrated  
539 differentiation process of its endodermal epithelial cells. *J Biol Chem*. 2013;  
540 288(2):1088-1098. doi: 10.1074/jbc.M112.393090
- 541 9. Kitisin K, Saha T, Blake T, Golestaneh N, Deng M, Kim C, et al. Tgf-Beta signaling  
542 in development. *Sci STKE*. 2007; 2007(399):cm1. doi: 10.1126/stke.3992007cm1
- 543 10. Nicholson AC, Hajjar DP. Transforming growth factor-beta up-regulates low density  
544 lipoprotein receptor-mediated cholesterol metabolism in vascular smooth muscle cells.  
545 *J Biol Chem*. 1992; 267(36):25982-25987.
- 546 11. Panousis CG, Evans G, Zuckerman SH. TGF-beta increases cholesterol efflux and  
547 ABC-1 expression in macrophage-derived foam cells: opposing the effects of IFN-  
548 gamma. *J Lipid Res*. 2001; 42(5):856-863.

- 549 12. Hori M, Miyazaki A, Tamagawa H, Satoh M, Furukawa K, Hakamata H, et al. Up-  
550 regulation of acyl-coenzyme A:cholesterol acyltransferase-1 by transforming growth  
551 factor-beta1 during differentiation of human monocytes into macrophages. *Biochem*  
552 *Biophys Res Commun.* 2004; 320(2):501-505. doi: 10.1016/j.bbrc.2004.05.190
- 553 13. Cooley JR, Yatskievych TA, Antin PB. Embryonic expression of the transforming  
554 growth factor beta ligand and receptor genes in chicken. *Dev Dyn.* 2014; 243(3):497-  
555 508. doi: 10.1002/dvdy.24085
- 556 14. Liu W, Wang X. Prediction of functional microRNA targets by integrative modeling  
557 of microRNA binding and target expression data. *Genome Biol.* 2019; 20(1):18. doi:  
558 10.1186/s13059-019-1629-z
- 559 15. Wong N, Wang X. miRDB: an online resource for microRNA target prediction and  
560 functional annotations. *Nucleic Acids Res.* 2015; 43:D146-152. doi:  
561 10.1093/nar/gku1104
- 562 16. Agarwal V, Bell GW, Nam JW, Bartel DP. Predicting effective microRNA target sites  
563 in mammalian mRNAs. *Elife.* 2015; 4. doi: 10.7554/eLife.05005
- 564 17. Lin HJ, Wang SH, Pan YH, Ding ST. Primary endodermal epithelial cell culture from  
565 the yolk sac membrane of Japanese quail embryos. *J Vis Exp.* 2016; (109). doi:  
566 10.3791/53624

- 567 18. Wurthner JU, Frank DB, Felici A, Green HM, Cao Z, Schneider MD, et al.  
568 Transforming growth factor-beta receptor-associated protein 1 is a Smad4 chaperone.  
569 J Biol Chem. 2001; 276(22):19495-19502. doi:10.1074/jbc.M006473200
- 570 19. Datta PK, Moses HL. STRAP and Smad7 synergize in the inhibition of transforming  
571 growth factor beta signaling. Mol Cell Biol. 2000; 20(9):3157-3167.
- 572 20. Kavsak P, Rasmussen RK, Causing CG, Bonni S, Zhu H, Thomsen GH, et al. Smad7  
573 binds to Smurf2 to form an E3 ubiquitin ligase that targets the TGF beta receptor for  
574 degradation. Mol Cell. 2000; 6(6):1365-1375.
- 575 21. Xu P, Liu J, Derynck R. Post-translational regulation of TGF- $\beta$  receptor and Smad  
576 signaling. FEBS Lett. 2012; 586(14):1871-1884. doi: 10.1016/j.febslet.2012.05.010
- 577 22. Glazov EA, Cottee PA, Barris WC, Moore RJ, Dalrymple BP, Tizard ML. A  
578 microRNA catalog of the developing chicken embryo identified by a deep sequencing  
579 approach. Genome Res. 2008; 18(6):957-964. doi: 10.1101/gr.074740.107
- 580 23. Hicks JA, Tembhurne P, Liu HC. MicroRNA expression in chicken embryos. Poult  
581 Sci. 2008; 87(11):2335-2343. doi: 10.3382/ps.2008-00114
- 582 24. Li T, Wu R, Zhang Y, Zhu D. A systematic analysis of the skeletal muscle miRNA  
583 transcriptome of chicken varieties with divergent skeletal muscle growth identifies  
584 novel miRNAs and differentially expressed miRNAs. BMC Genomics. 2011; 12:186.

585 doi: 10.1186/1471-2164-12-186

- 586 25. Su R, Lin HS, Zhang XH, Yin XL, Ning HM, Liu B, et al. MiR-181 family: regulators  
587 of myeloid differentiation and acute myeloid leukemia as well as potential therapeutic  
588 targets. *Oncogene*. 2015; 34(25):3226-3239. doi: 10.1038/onc.2014.274
- 589 26. Wu C, Gong Y, Yuan J, Zhang W, Zhao G, Li H, et al. microRNA-181a represses ox-  
590 LDL-stimulated inflammatory response in dendritic cell by targeting c-Fos. *J Lipid Res*.  
591 2012; 53(11):2355-2363. doi: 10.1194/jlr.M028878
- 592 27. Li H, Chen X, Guan L, Qi Q, Shu G, Jiang Q, et al. MiRNA-181a regulates  
593 adipogenesis by targeting tumor necrosis factor- $\alpha$  (TNF- $\alpha$ ) in the porcine model. *PLoS*  
594 *ONE*. 2013; 8(10):e71568. doi: 10.1371/journal.pone.0071568
- 595 28. Ouyang D, Xu L, Zhang L, Guo D, Tan X, Yu X, et al. MiR-181a-5p regulates 3T3-L1  
596 cell adipogenesis by targeting Smad7 and Tcf7l2. *Acta Biochim Biophys Sin*. 2016;  
597 48(11):1034-1041. doi:10.1093/abbs/gmw100
- 598 29. Zhang Z, Gao Y, Xu MQ, Wang CJ, Fu XH, Liu JB, et al. miR-181a regulate porcine  
599 preadipocyte differentiation by targeting TGFBR1. *Gene*. 2019; 681:45-51. doi:  
600 10.1016/j.gene.2018.09.046
- 601 30. Lian L, Li X, Zhao C, Han B, Qu L, Song J, et al. Chicken gga-miR-181a targets  
602 MYBL1 and shows an inhibitory effect on proliferation of Marek's disease virus-

- 603 transformed lymphoid cell line. *Poult Sci.* 2015; 94(11):2616-2621. doi:  
604 10.3382/ps/pev289
- 605 31. Yao J, Wang Y, Wang W, Wang N, Li H. Solexa sequencing analysis of chicken pre-  
606 adipocyte microRNAs. *Biosci Biotechnol Biochem.* 2011; 75(1):54-61.  
607 doi:10.1271/bbb.100530
- 608 32. An F, Zhan Q, Xia M, Jiang L, Lu G, Huang M, et al. From moderately severe to severe  
609 hypertriglyceridemia induced acute pancreatitis: circulating miRNAs play role as  
610 potential biomarkers. *PLoS ONE.* 2014; 9(11):e111058. doi:  
611 10.1371/journal.pone.0111058
- 612 33. Kennell JA, Gerin I, MacDougald OA, Cadigan KM. The microRNA miR-8 is a  
613 conserved negative regulator of Wnt signaling. *Proc Natl Acad Sci USA.* 2008;  
614 105(40):15417-15422. doi: 10.1073/pnas.0807763105
- 615 34. Sun Y, Shen S, Liu X, Tang H, Wang Z, Yu Z, et al. MiR-429 inhibits cells growth and  
616 invasion and regulates EMT-related marker genes by targeting Onecut2 in colorectal  
617 carcinoma. *Mol Cell Biochem.* 2014; 390(1-2):19-30. doi: 10.1007/s11010-013-1950-  
618 x
- 619 35. Ye ZB, Ma G, Zhao YH, Xiao Y, Zhan Y, Jing C, et al. miR-429 inhibits migration and  
620 invasion of breast cancer cells in vitro. *Int J Oncol.* 2015; 46:531-538. doi:

621 10.3892/ijo.2014.2759

622 36. Boese AS, Saba R, Campbell K, Majer A, Medina S, Burton L, et al. MicroRNA  
623 abundance is altered in synaptoneurosomes during prion disease. *Mol Cell Neurosci.*  
624 2016; 71:13-24. doi: 10.1016/j.mcn.2015.12.001

625 37. Chan RB, Oliveira TG, Cortes EP, Honig LS, Duff KE, Small SA, et al. Comparative  
626 lipidomic analysis of mouse and human brain with Alzheimer disease. *J. Biol. Chem.*  
627 2012; 287(4):2678-2688. doi: 10.1074/jbc.M111.274142

628 38. Tajima Y, Ishikawa M, Maekawa K, Murayama M, Senoo Y, Nishimaki-Mogami T, et  
629 al. Lipidomic analysis of brain tissues and plasma in a mouse model expressing mutated  
630 human amyloid precursor protein/tau for Alzheimer's disease. *Lipids Health Dis.* 2013;  
631 12:68. doi: 10.1186/1476-511X-12-68

632 39. Shibuya Y, Chang CC, Chang TY. ACAT1/SOAT1 as a therapeutic target for  
633 Alzheimer's disease. *Future Med Chem.* 2015; 7(18):2451-2467. doi:  
634 10.4155/fmc.15.161

635 40. Hansson GK, Robertson AK, Söderberg-Nauclér C. Inflammation and atherosclerosis.  
636 *Annu Rev Pathol.* 2006; 1:297-329.

637 41. Xu J, Hu G, Lu M, Xiong Y, Li Q, Chang CC, et al. MiR-9 reduces human acyl-  
638 coenzyme A:cholesterol acyltransferase-1 to decrease THP-1 macrophage-derived

639 foam cell formation. *Acta Biochim Biophys Sin.* 2013; 45(11):953-962. doi:  
640 10.1093/abbs/gmt096

641 42. Wang B, He PP, Zeng GF, Zhang T, Ouyang XP. miR-467b regulates the cholesterol  
642 ester formation via targeting ACAT1 gene in RAW 264.7 macrophages. *Biochimie.*  
643 2017; 132:38-44. doi: 10.1016/j.biochi.2016.09.012



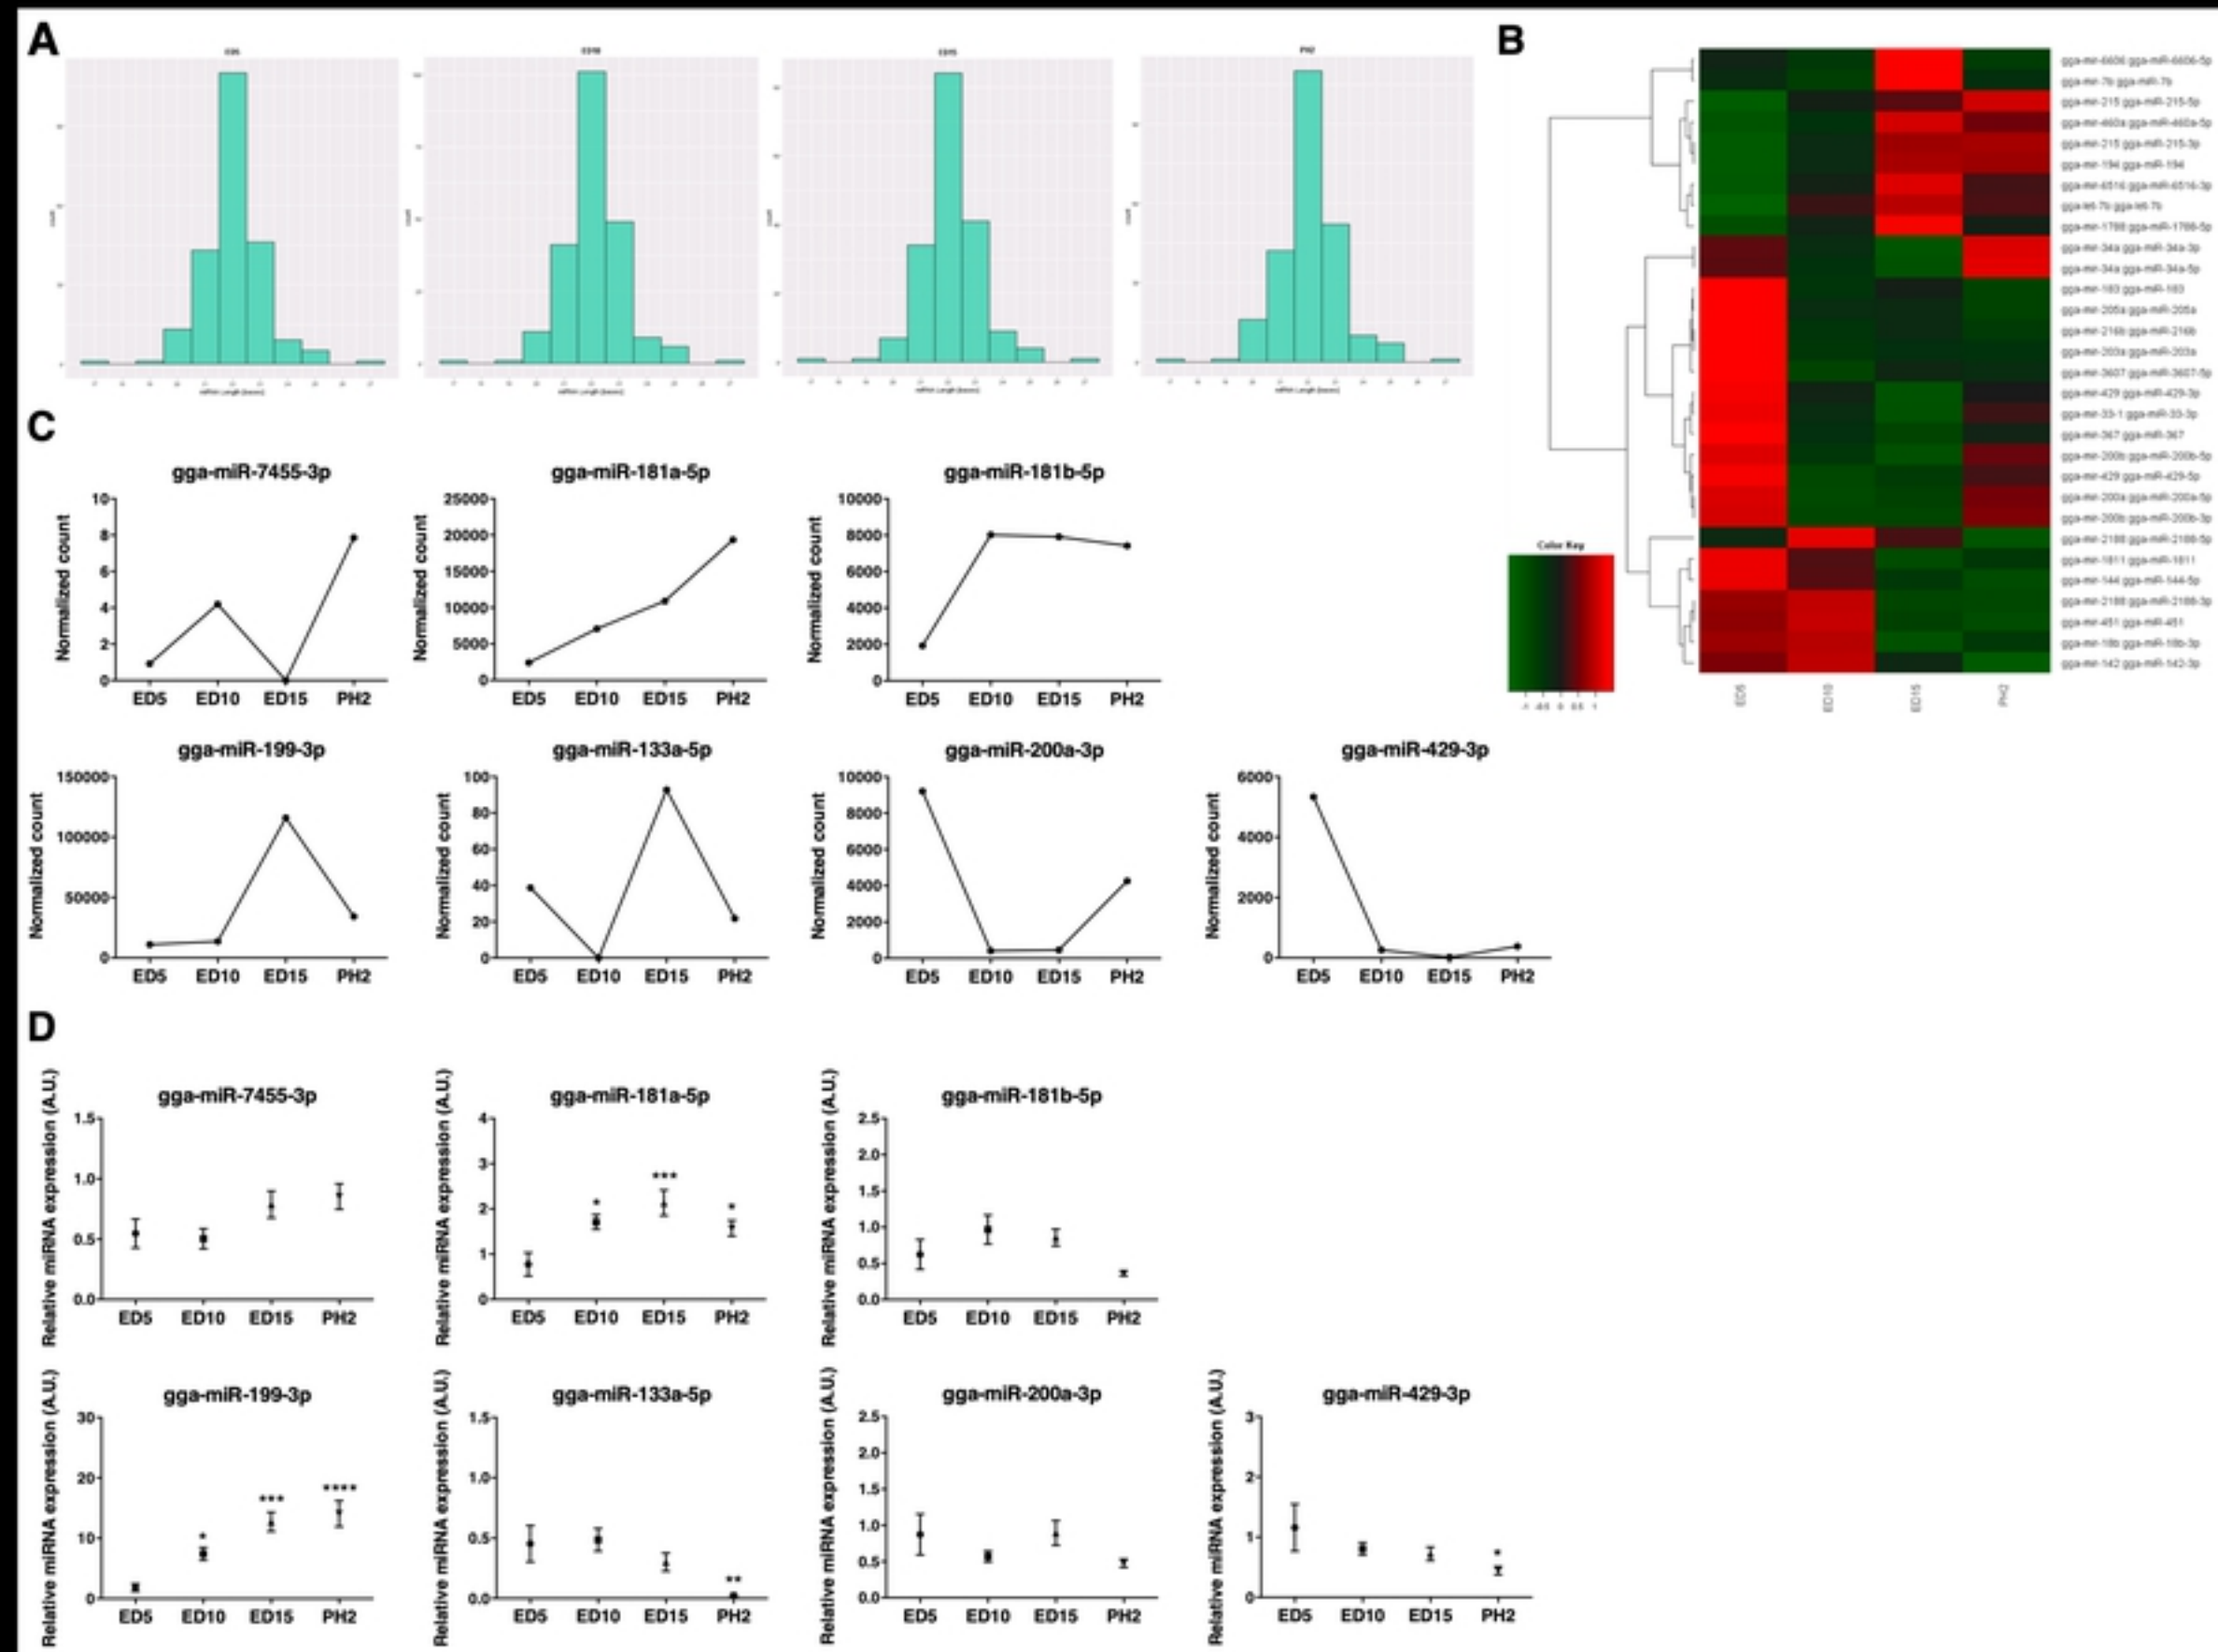

Fig 1

**gga-miR-7455-3p**

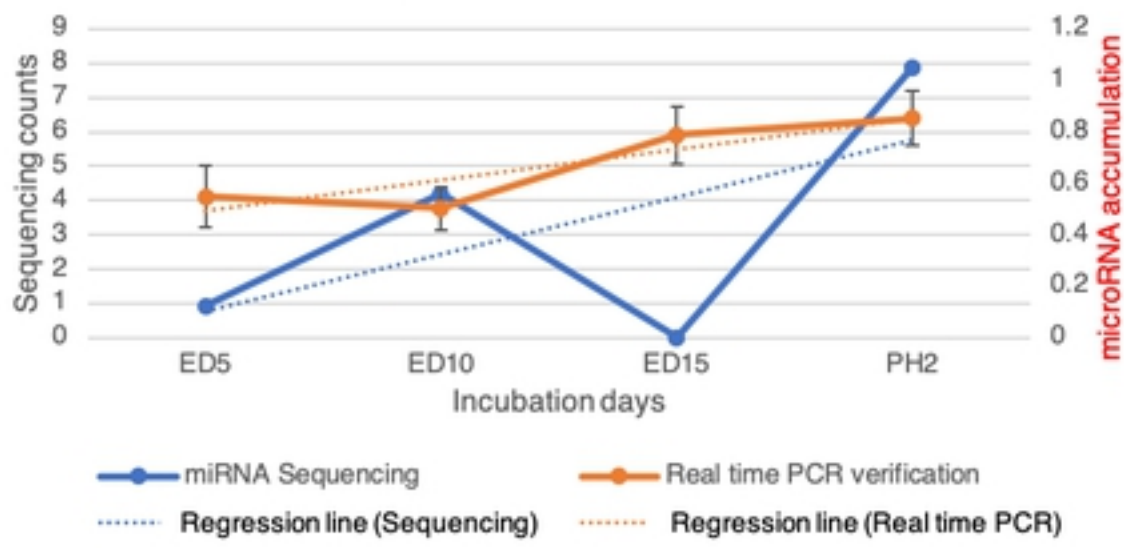

**gga-miR-181a-5p**

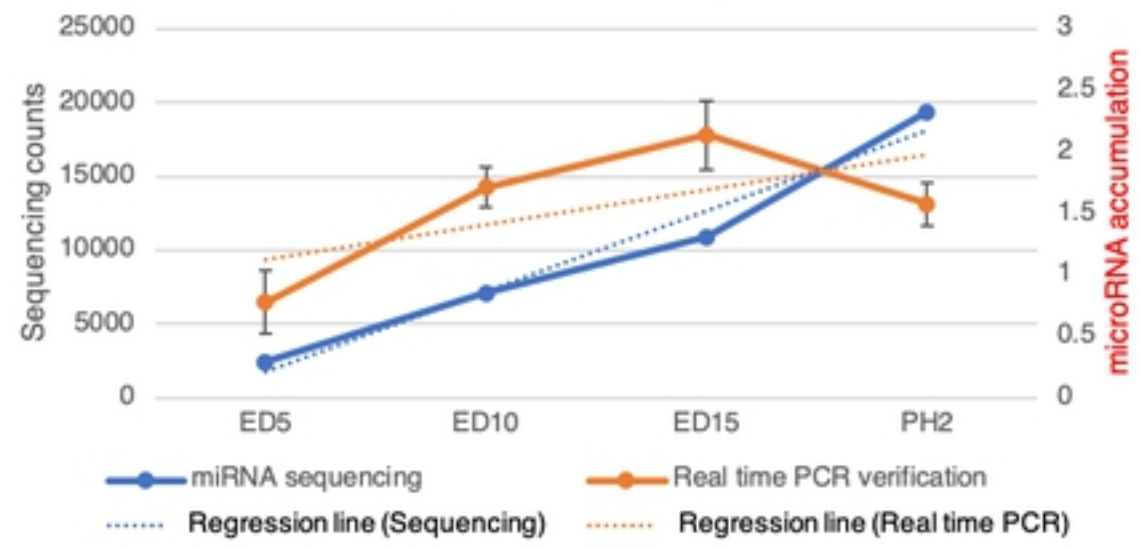

**Correlation=0.31757121**

**Correlation= 0.503335736**

**gga-miR-181b-5p**

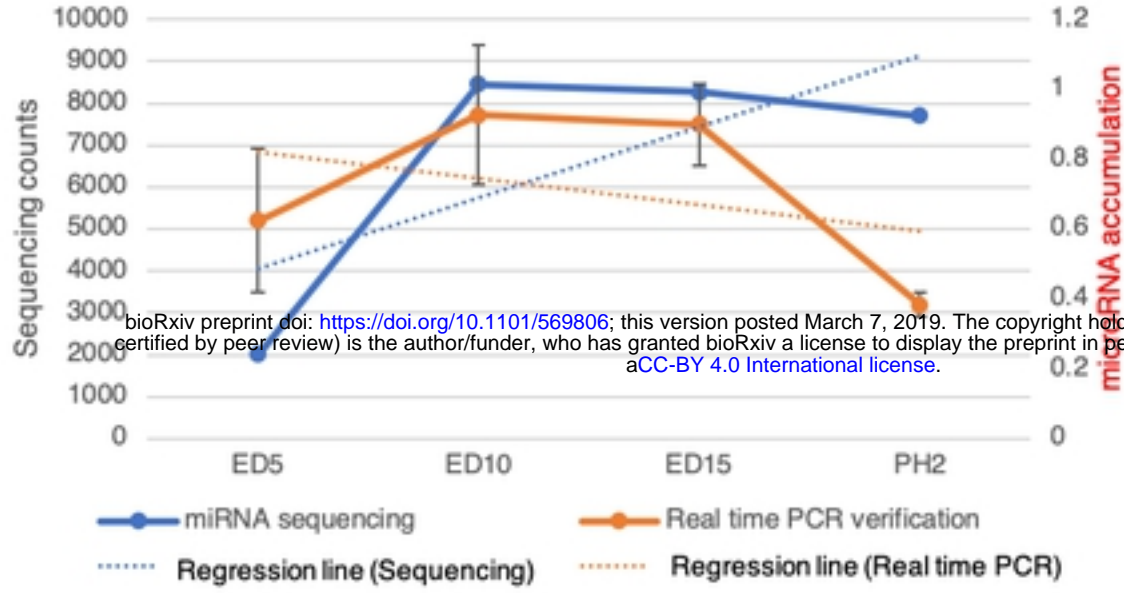

**gga-miR-199-3p**

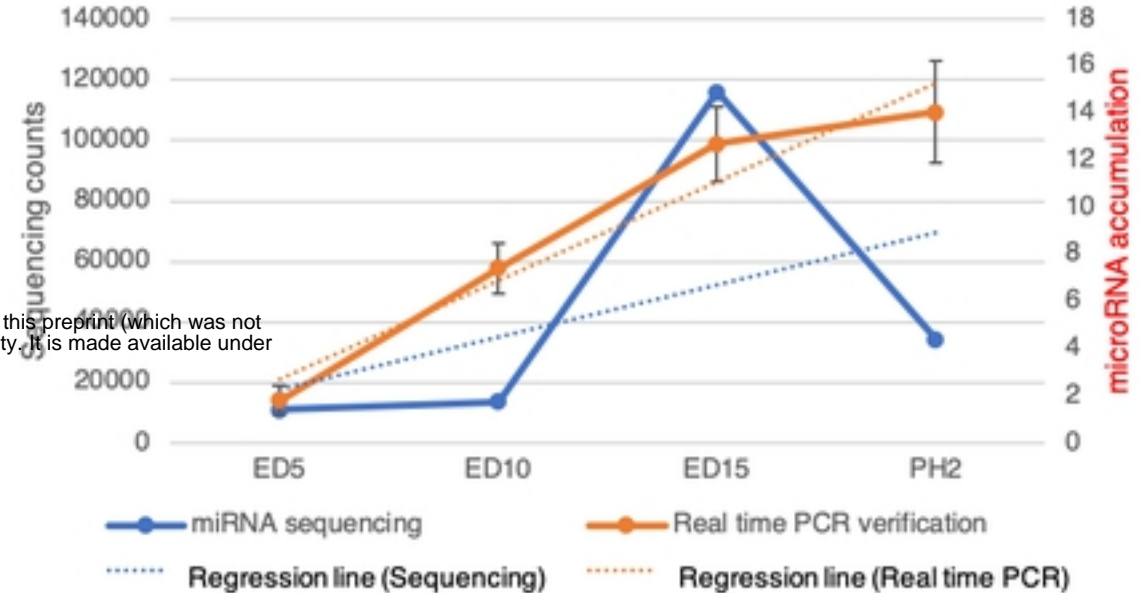

**Correlation= 0.316287108**

**Correlation= 0.610143255**

**gga-miR-133a-5p**

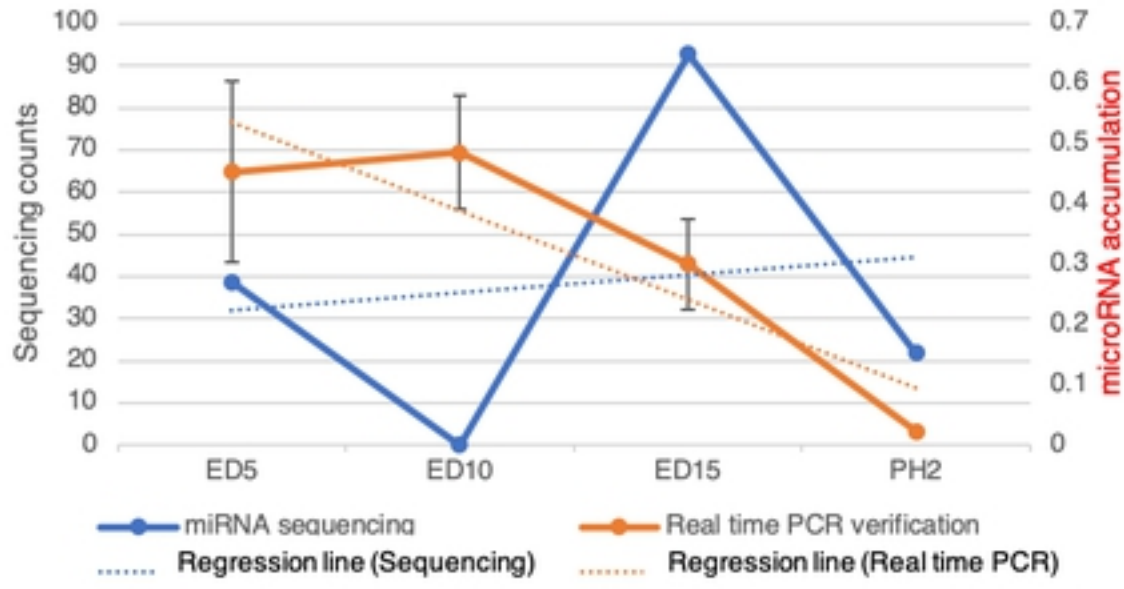

**gga-miR-200a-3p**

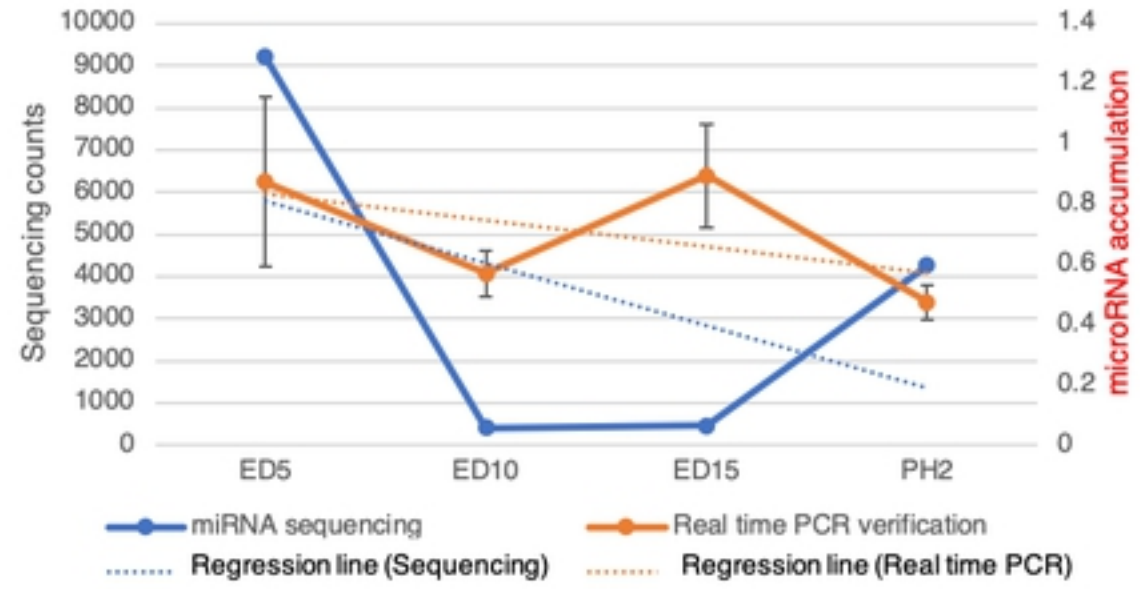

**Correlation= -0.09684383**

**Correlation= 0.238084732**

**gga-miR-429-3p**

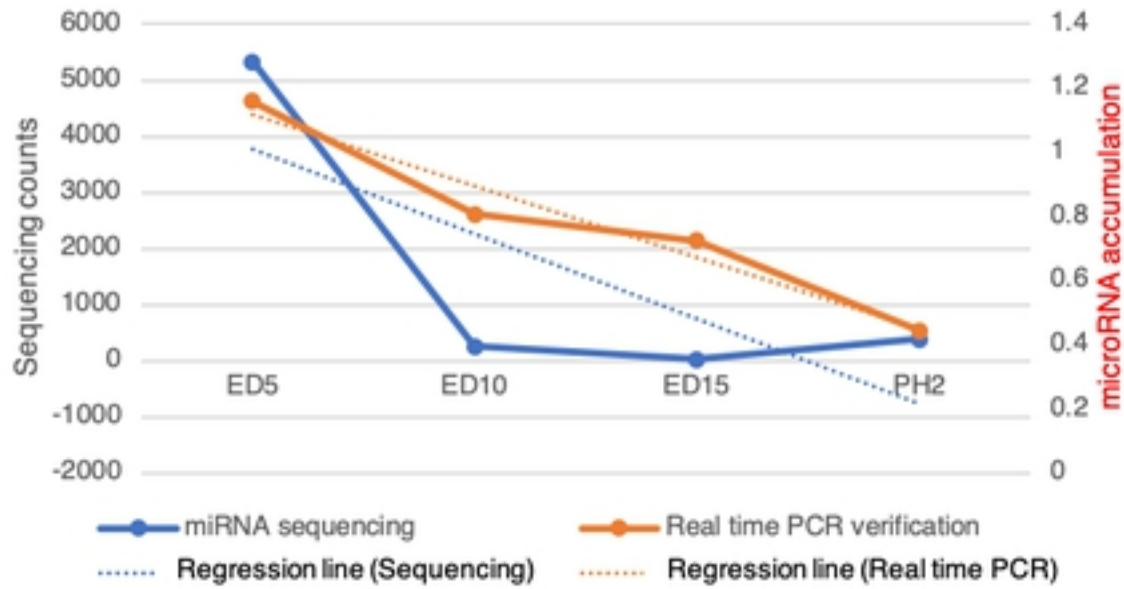

**Correlation= 0.831176843**

**Fig 2**

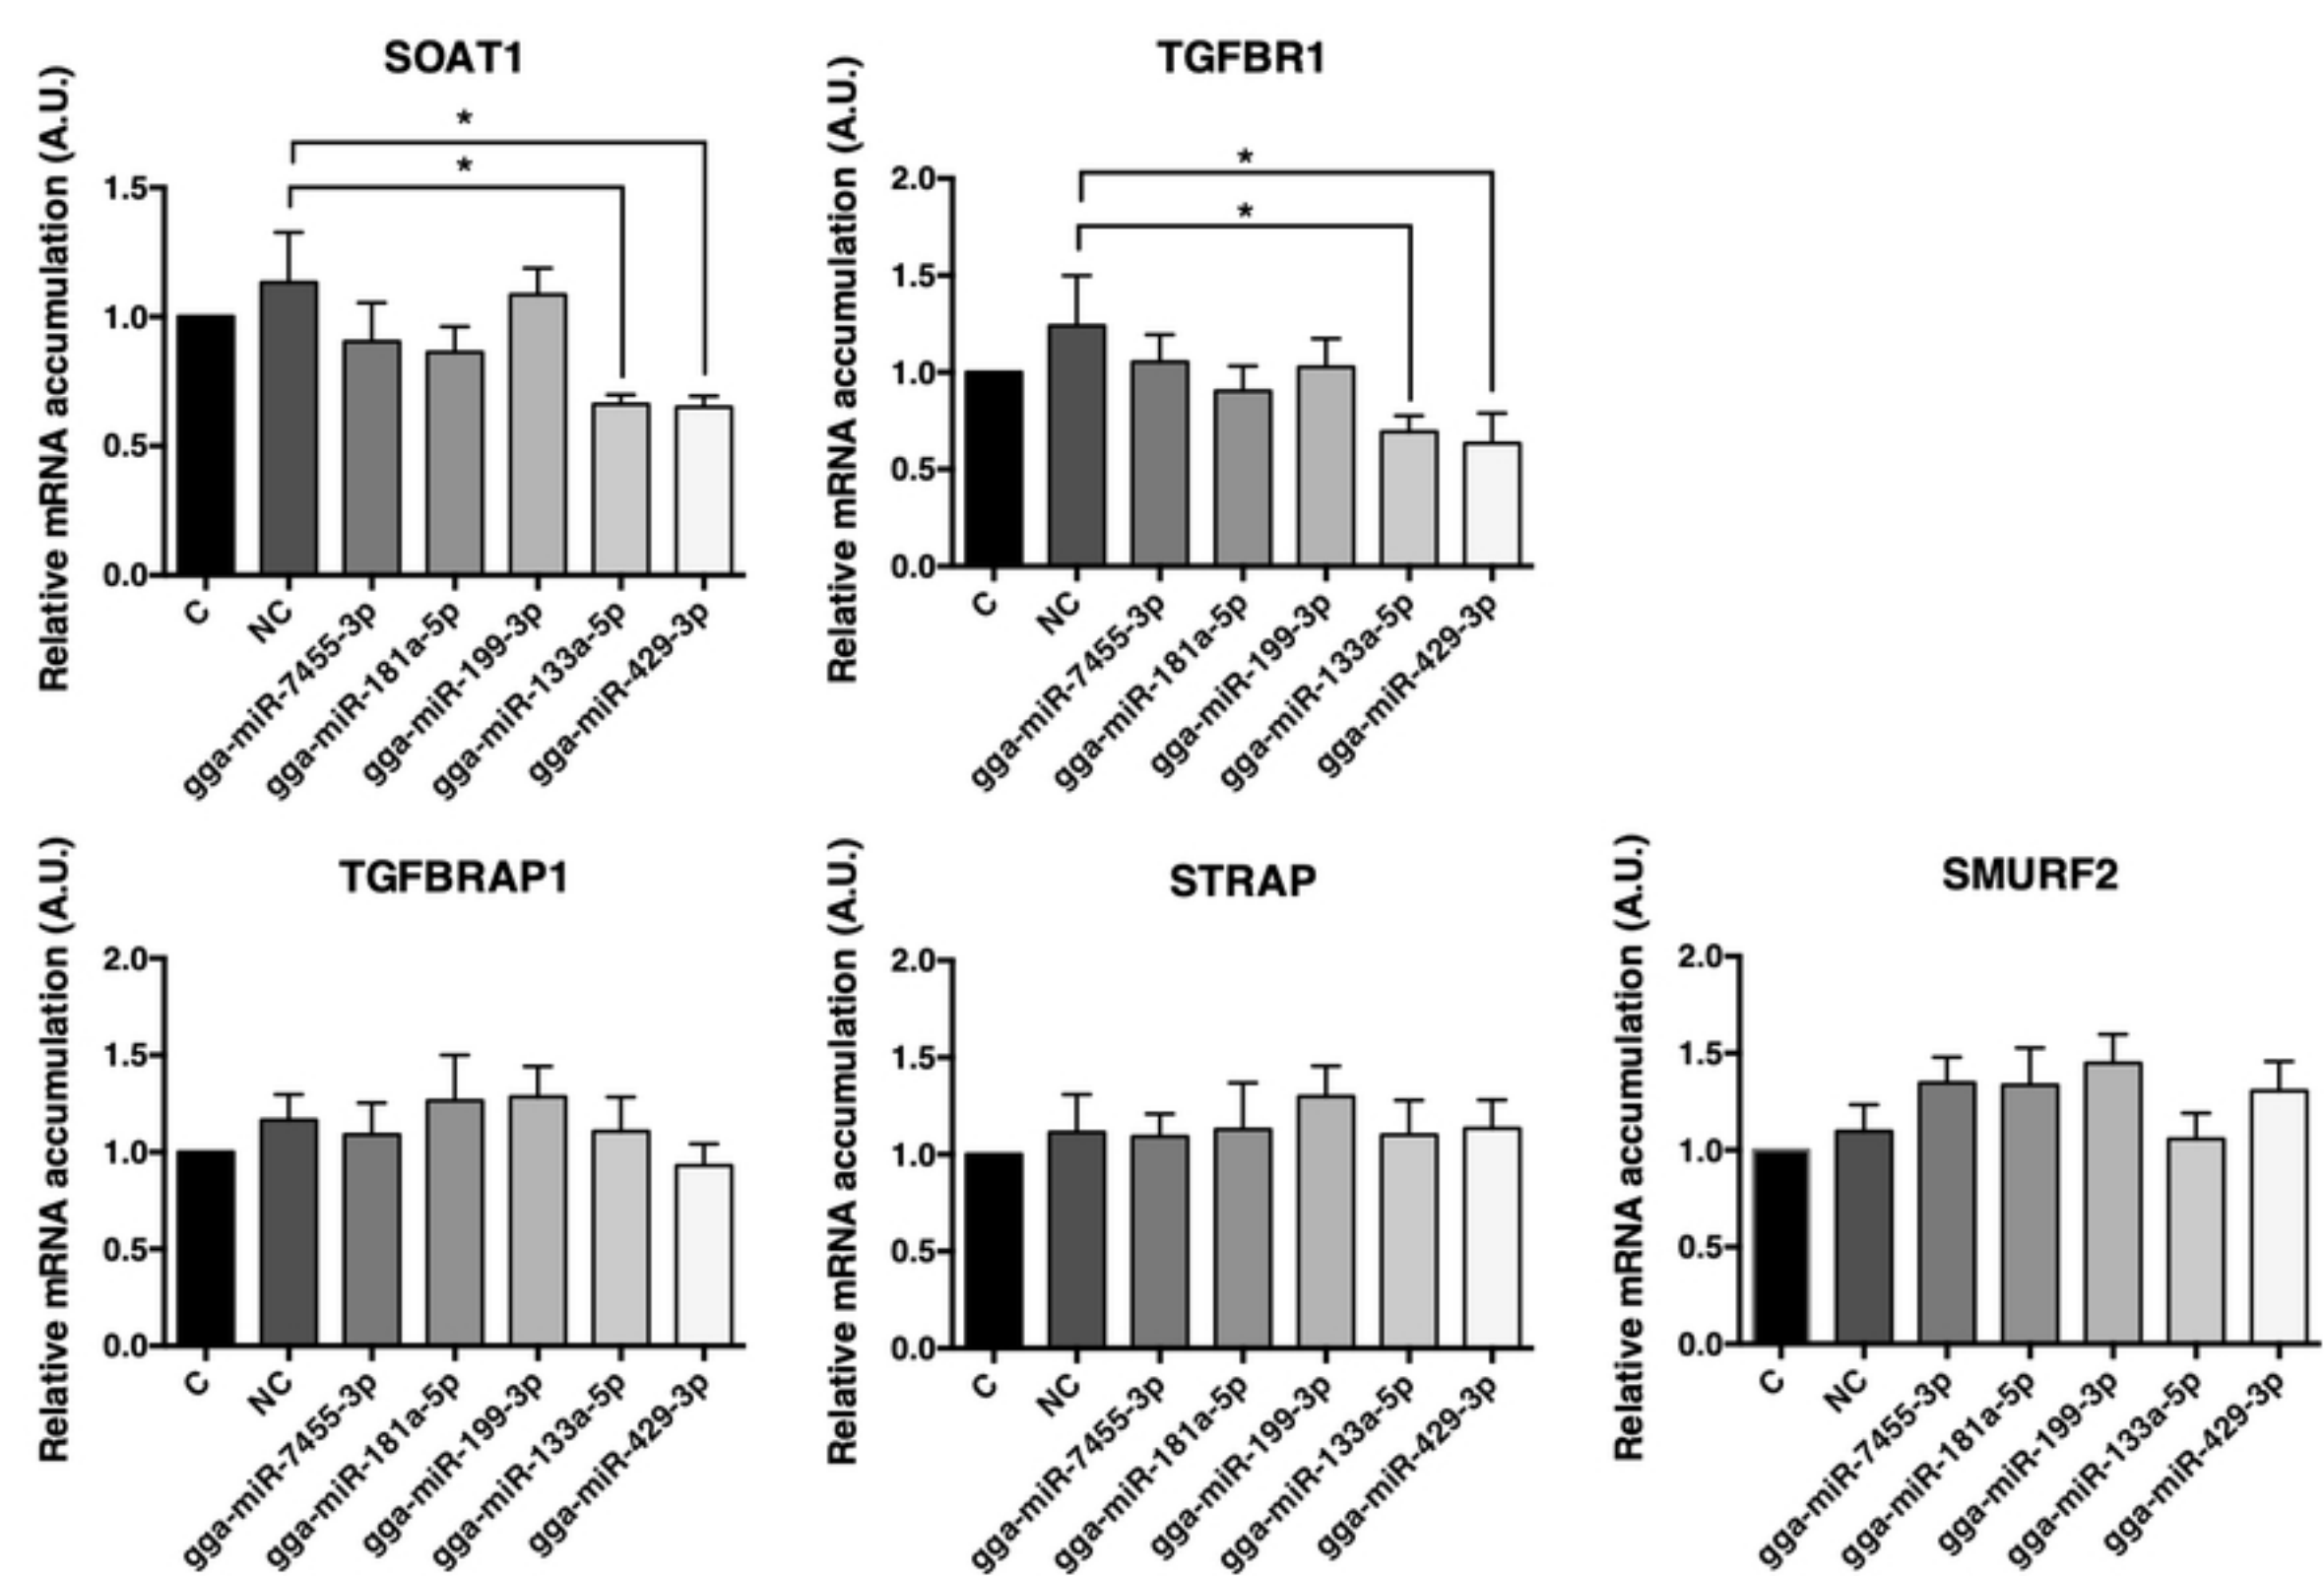

Fig 3

**A**

|              |             |                         |              |                     |                          |                   |
|--------------|-------------|-------------------------|--------------|---------------------|--------------------------|-------------------|
| PGK promoter | <i>luc2</i> | 3'UTR of TGFBR1 (573bp) | SV40 poly(A) | SV40 early promoter | <i>hRluc</i> -neo fusion | Synthetic poly(A) |
|--------------|-------------|-------------------------|--------------|---------------------|--------------------------|-------------------|

**B**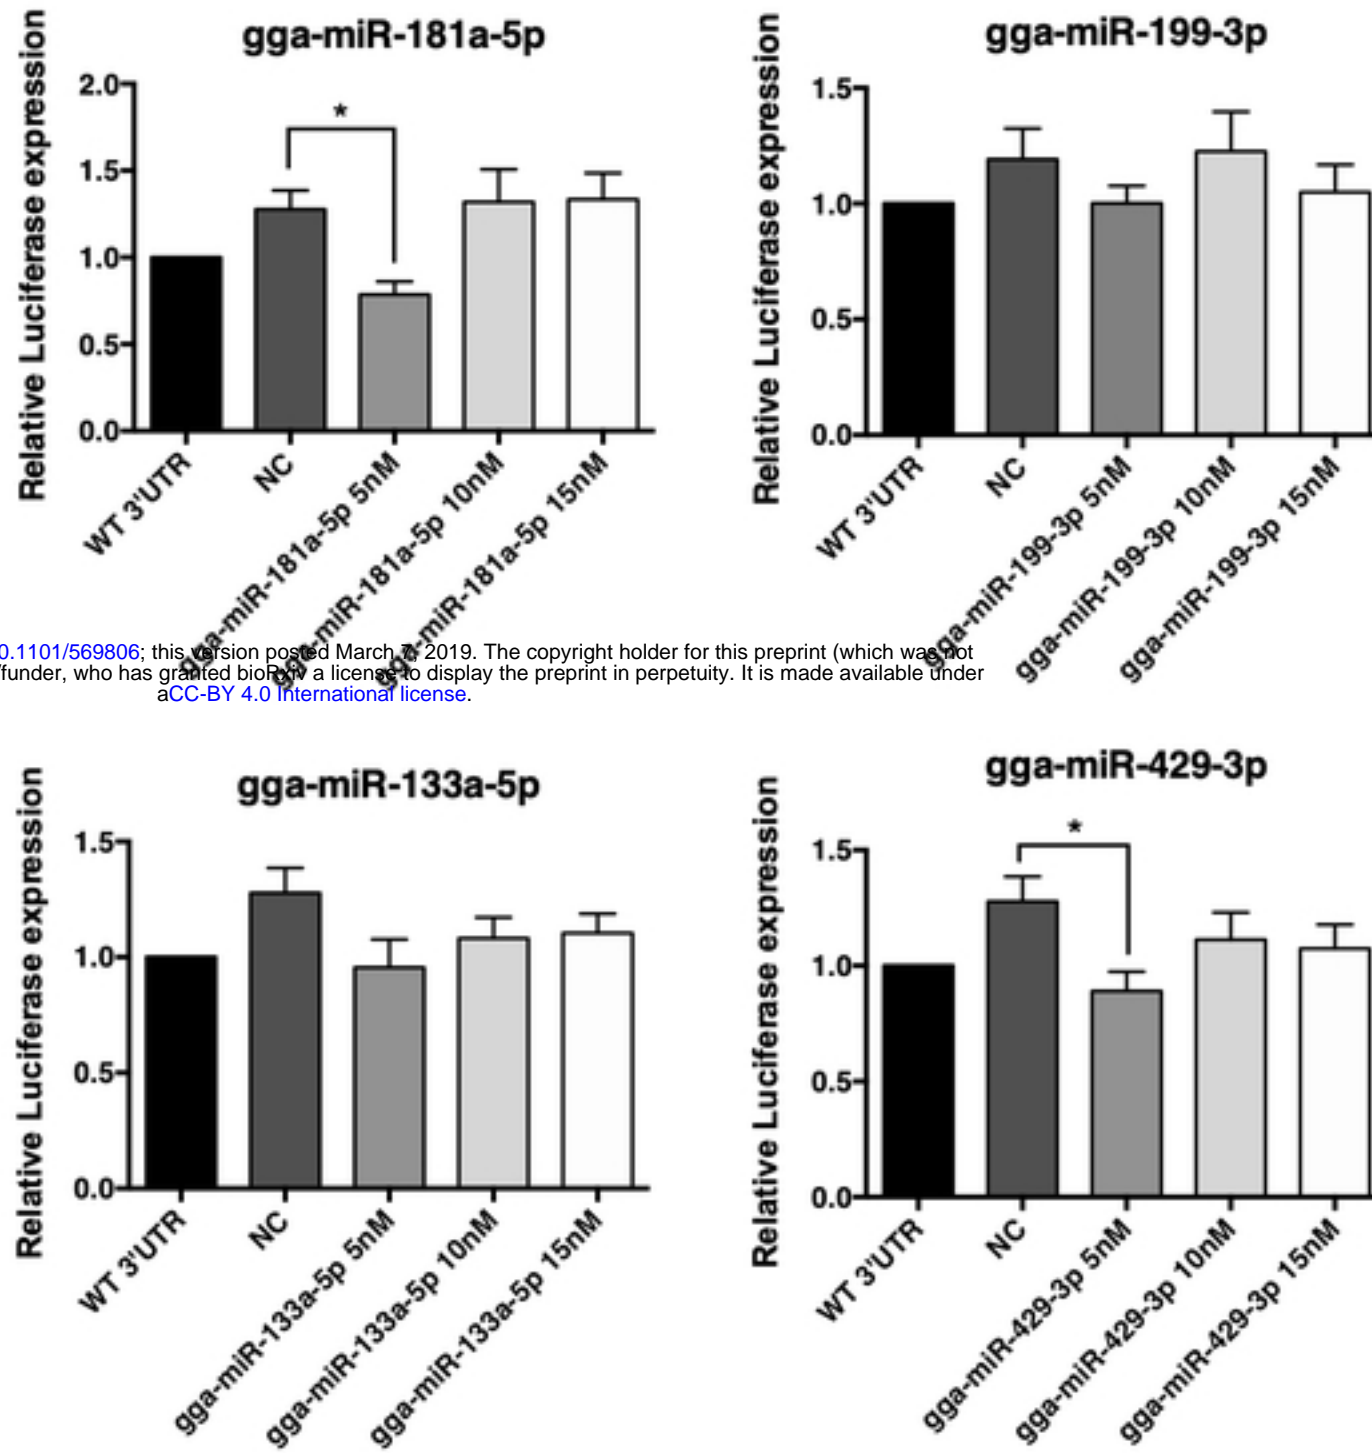

bioRxiv preprint doi: <https://doi.org/10.1101/569806>; this version posted March 1, 2019. The copyright holder for this preprint (which was not certified by peer review) is the author/funder, who has granted bioRxiv a license to display the preprint in perpetuity. It is made available under aCC-BY 4.0 International license.

**C**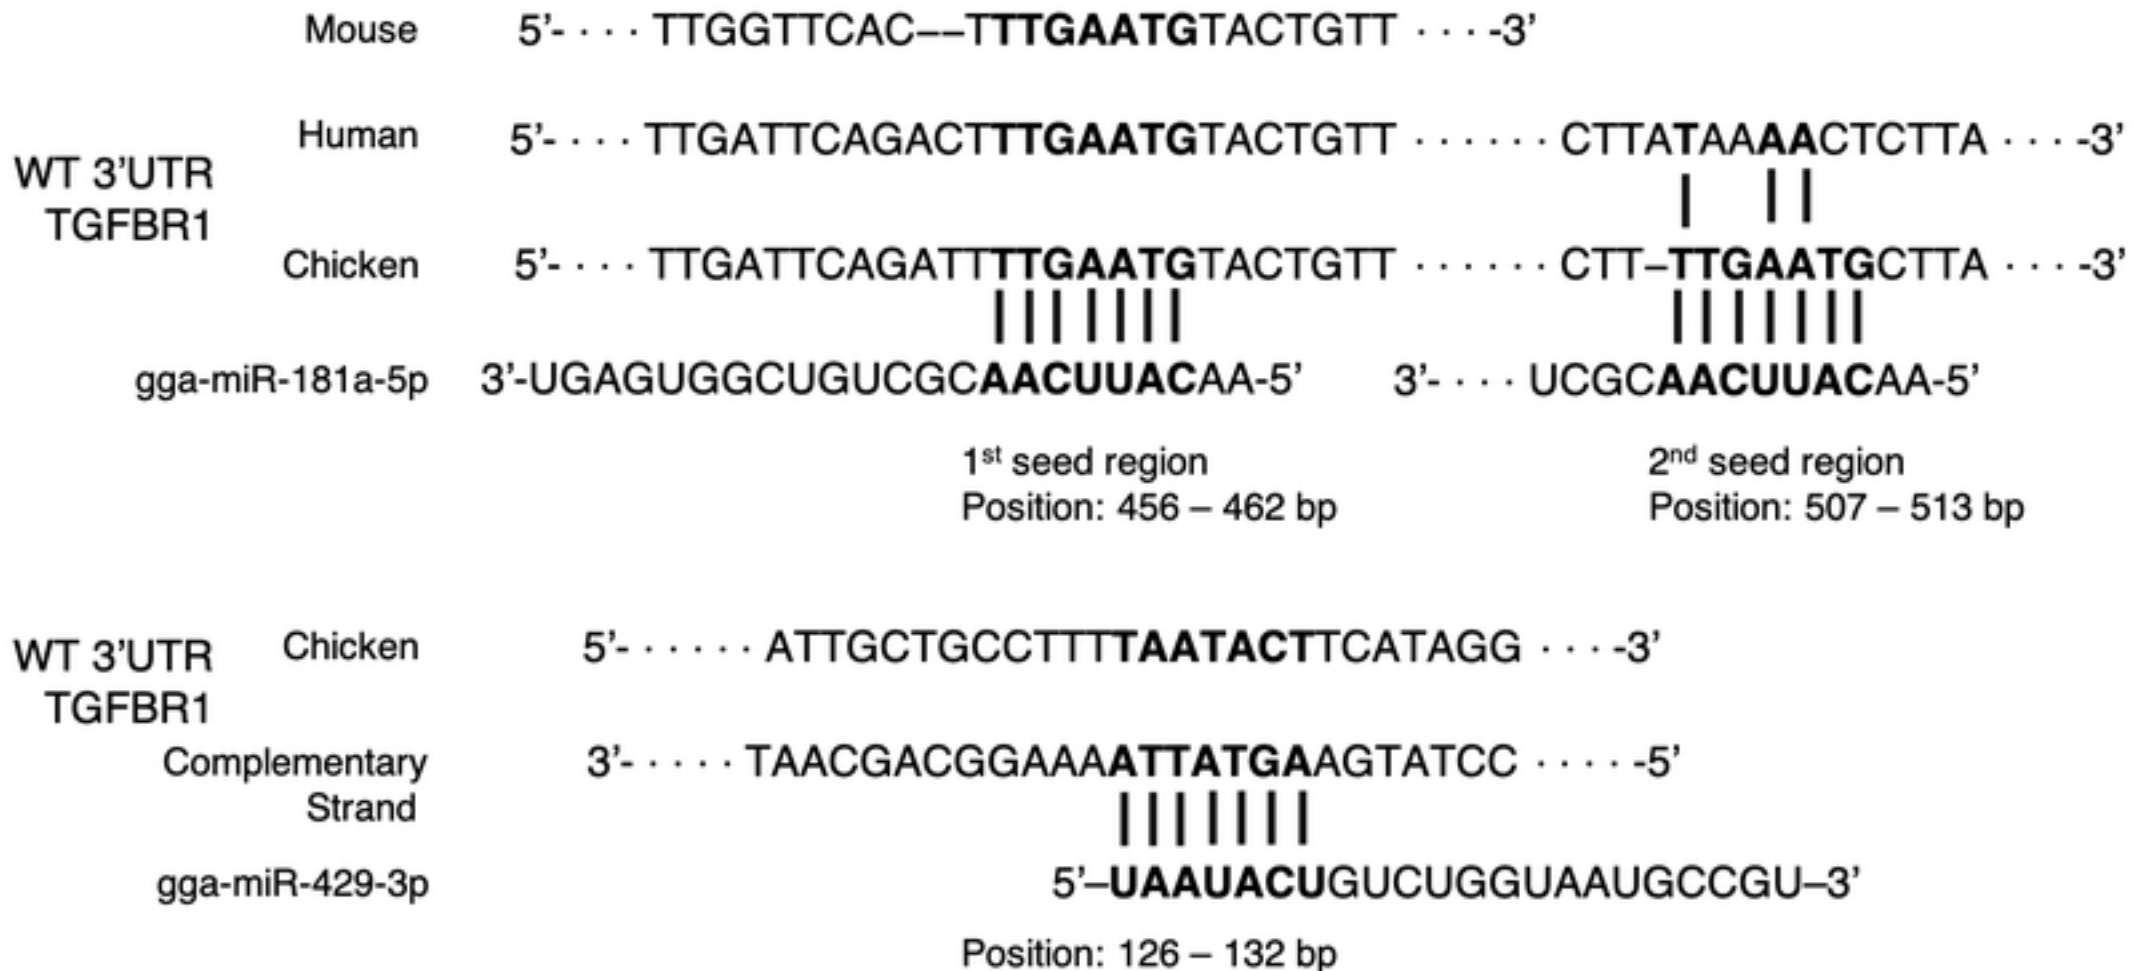

Fig 4

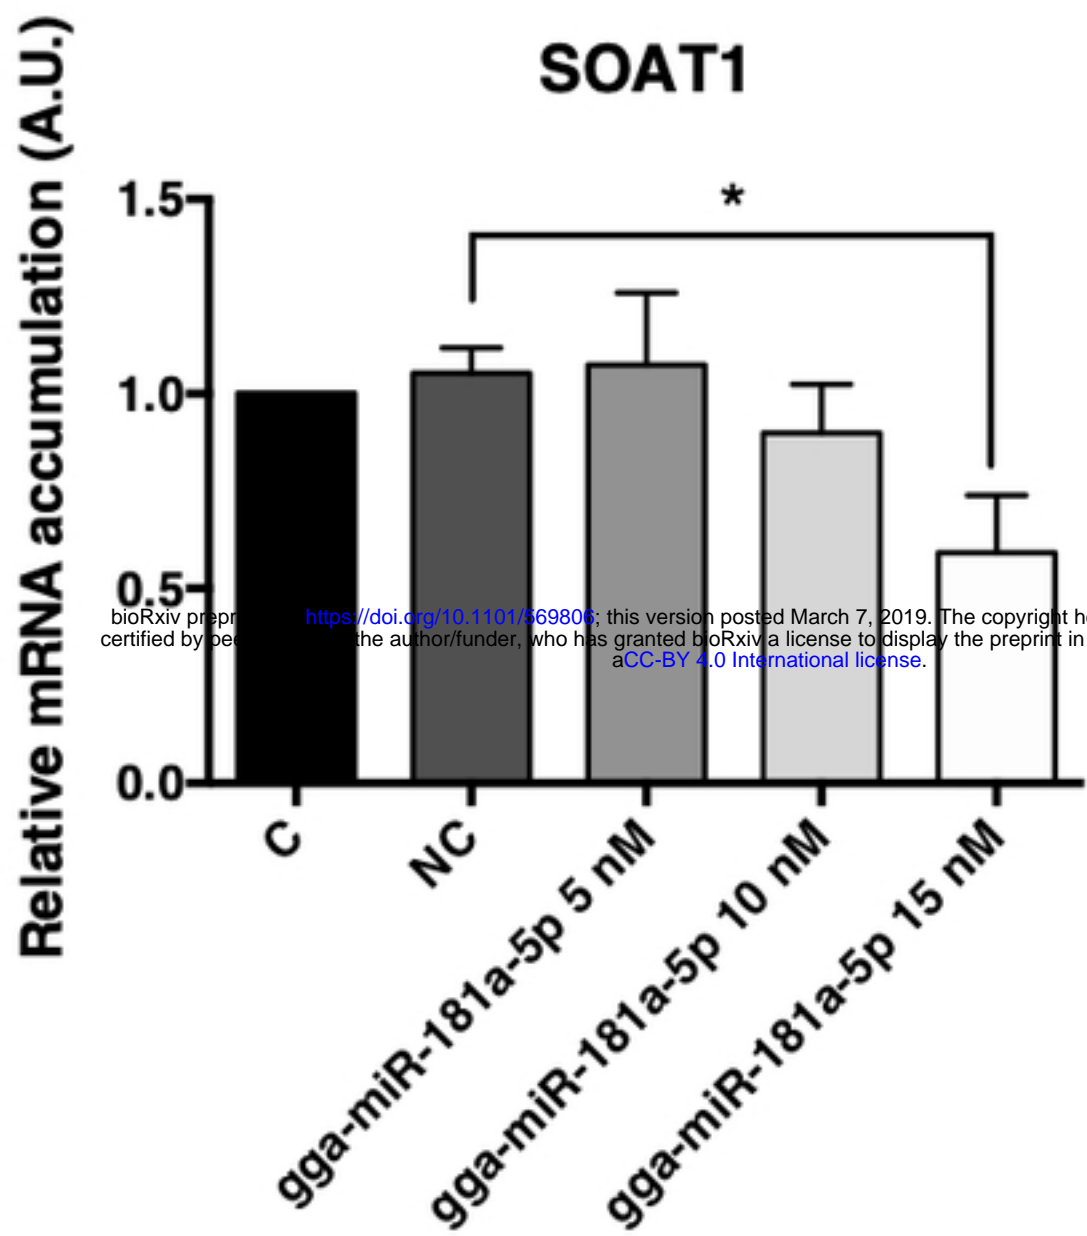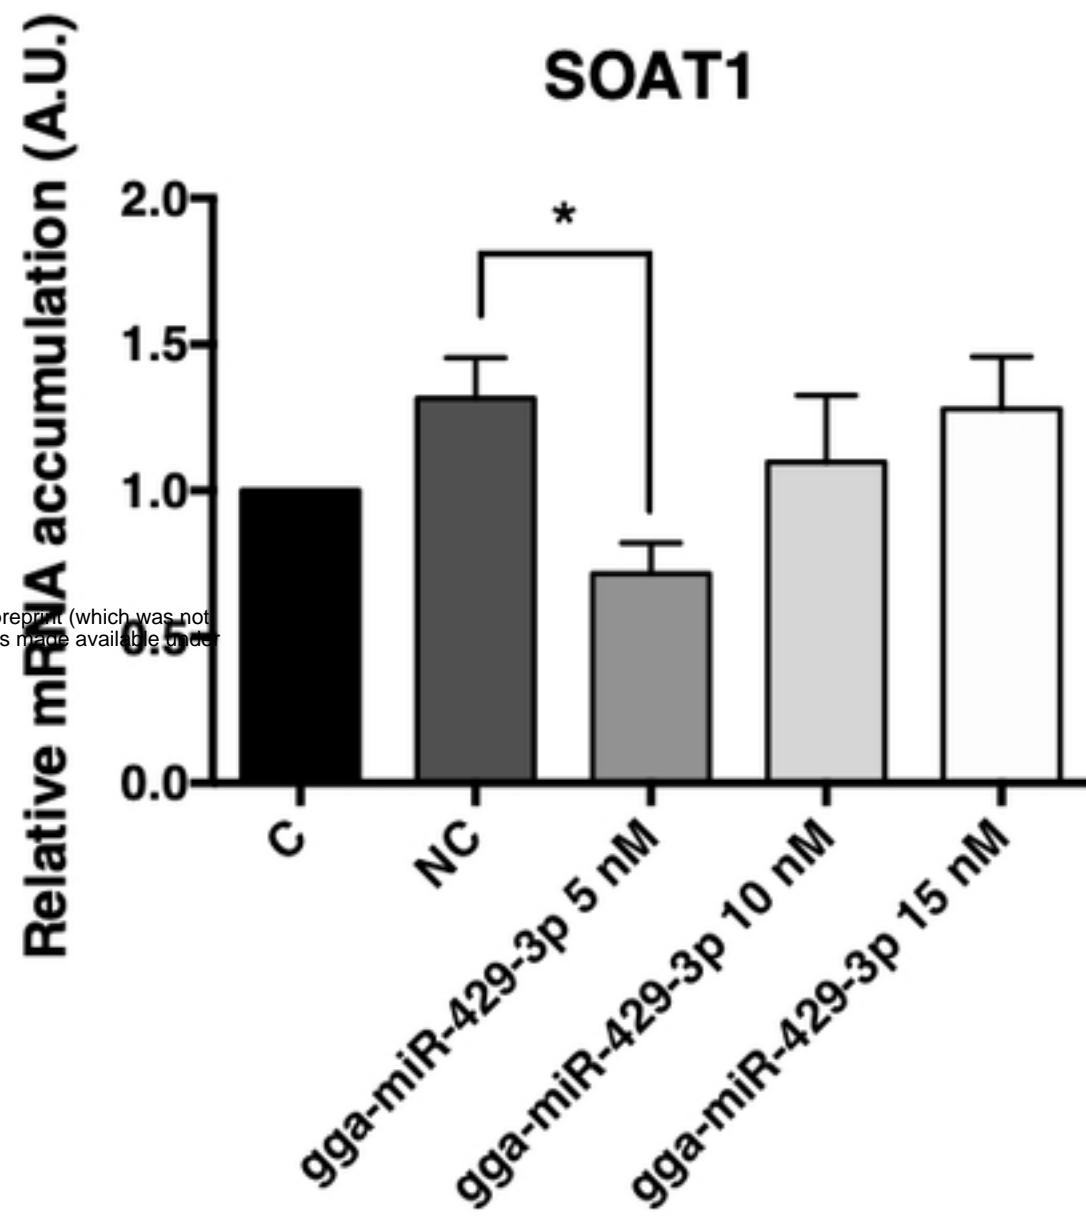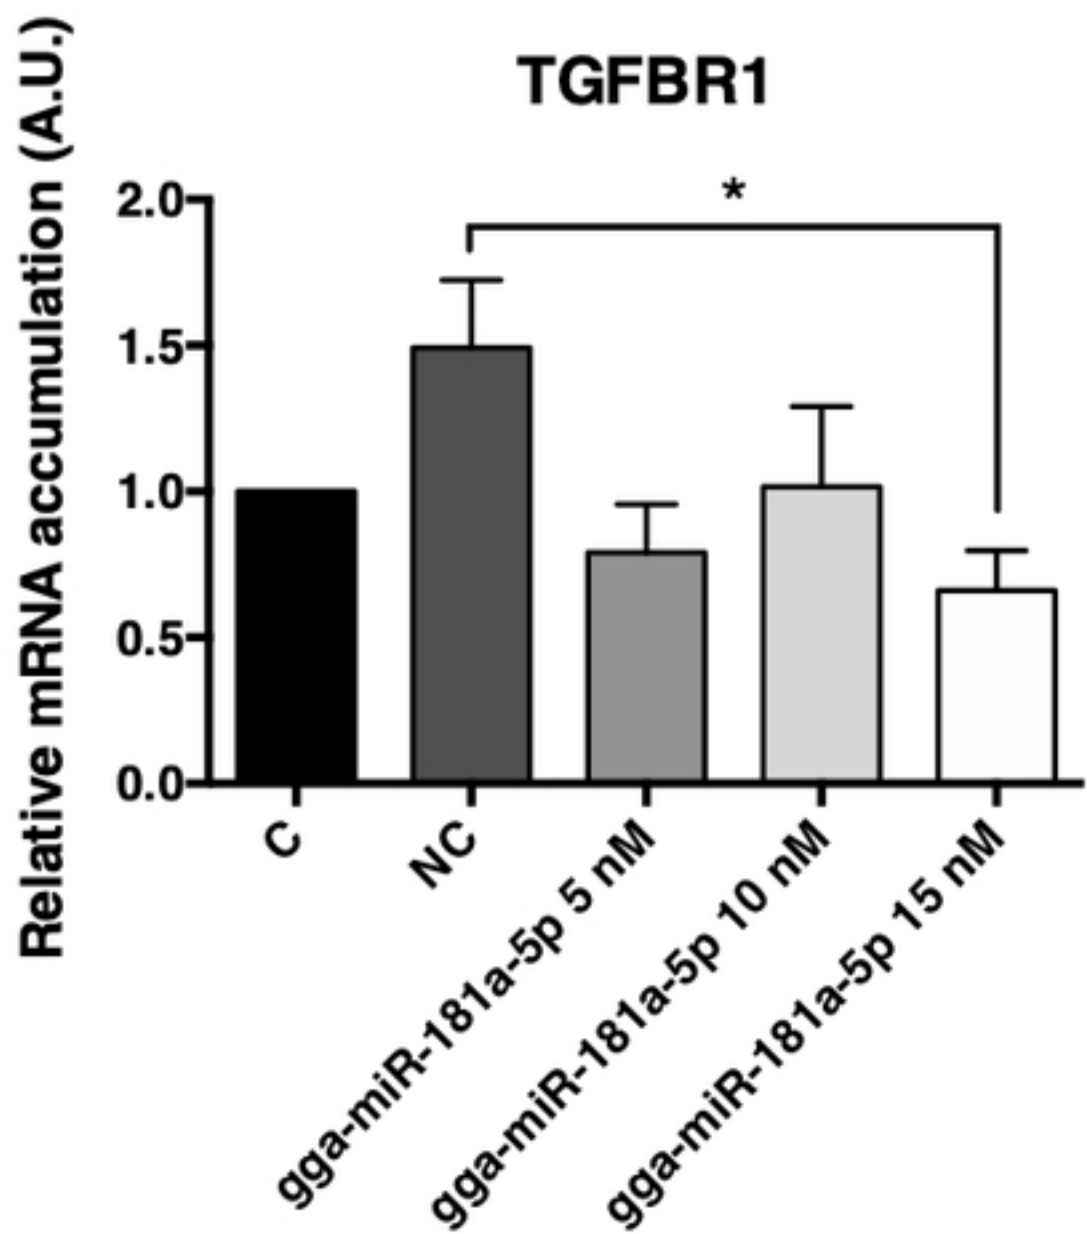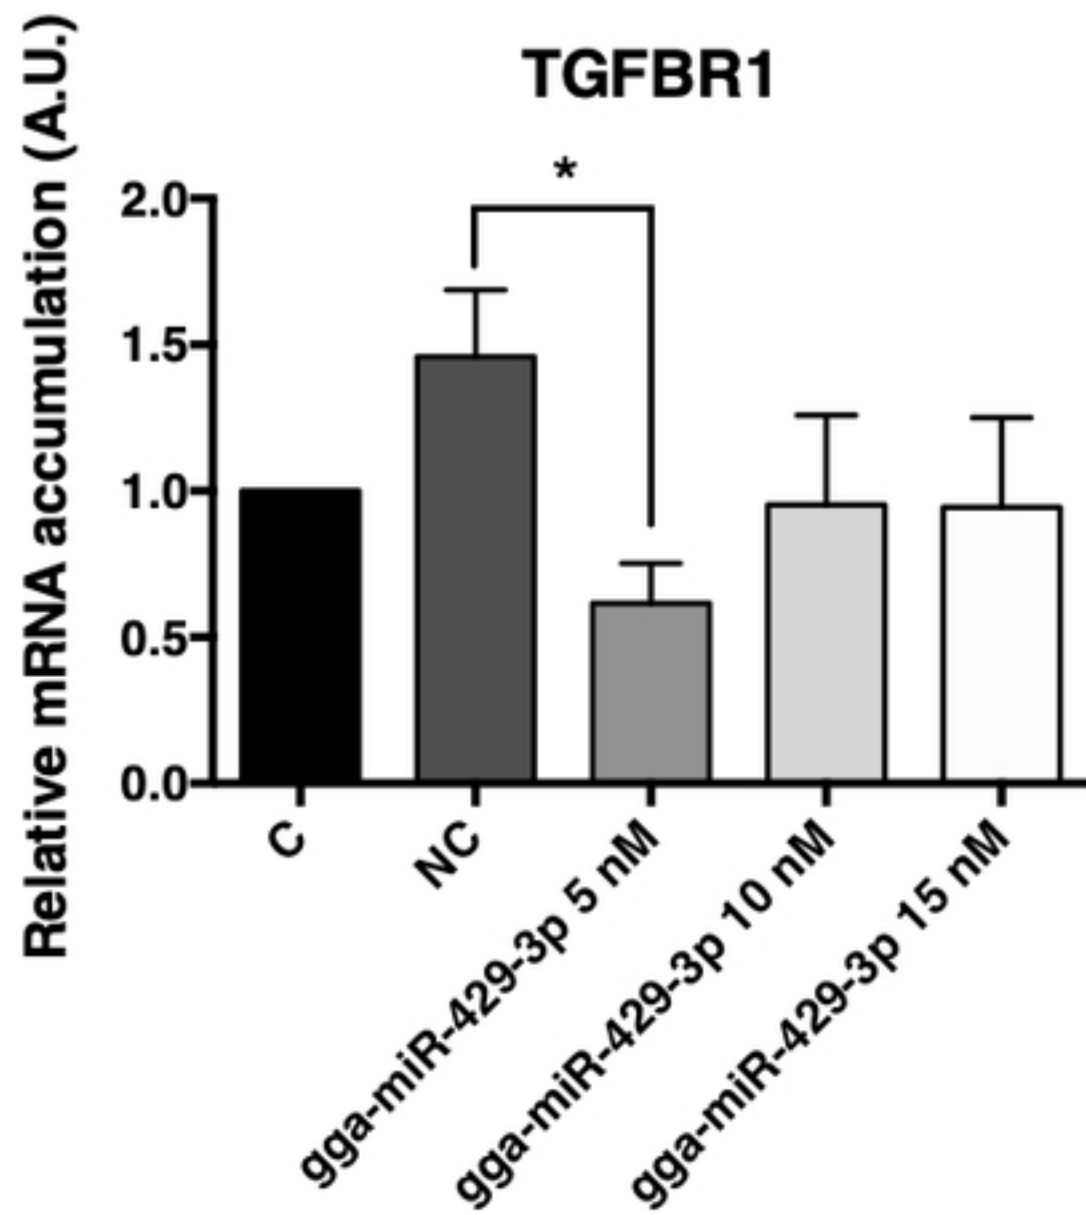

**A**

bioRxiv preprint doi: <https://doi.org/10.1101/369806>; this version posted March 7, 2019. The copyright holder for this preprint (which was not certified by peer review) is the author/funder, who has granted bioRxiv a license to display the preprint in perpetuity. It is made available under aCC-BY 4.0 International license.

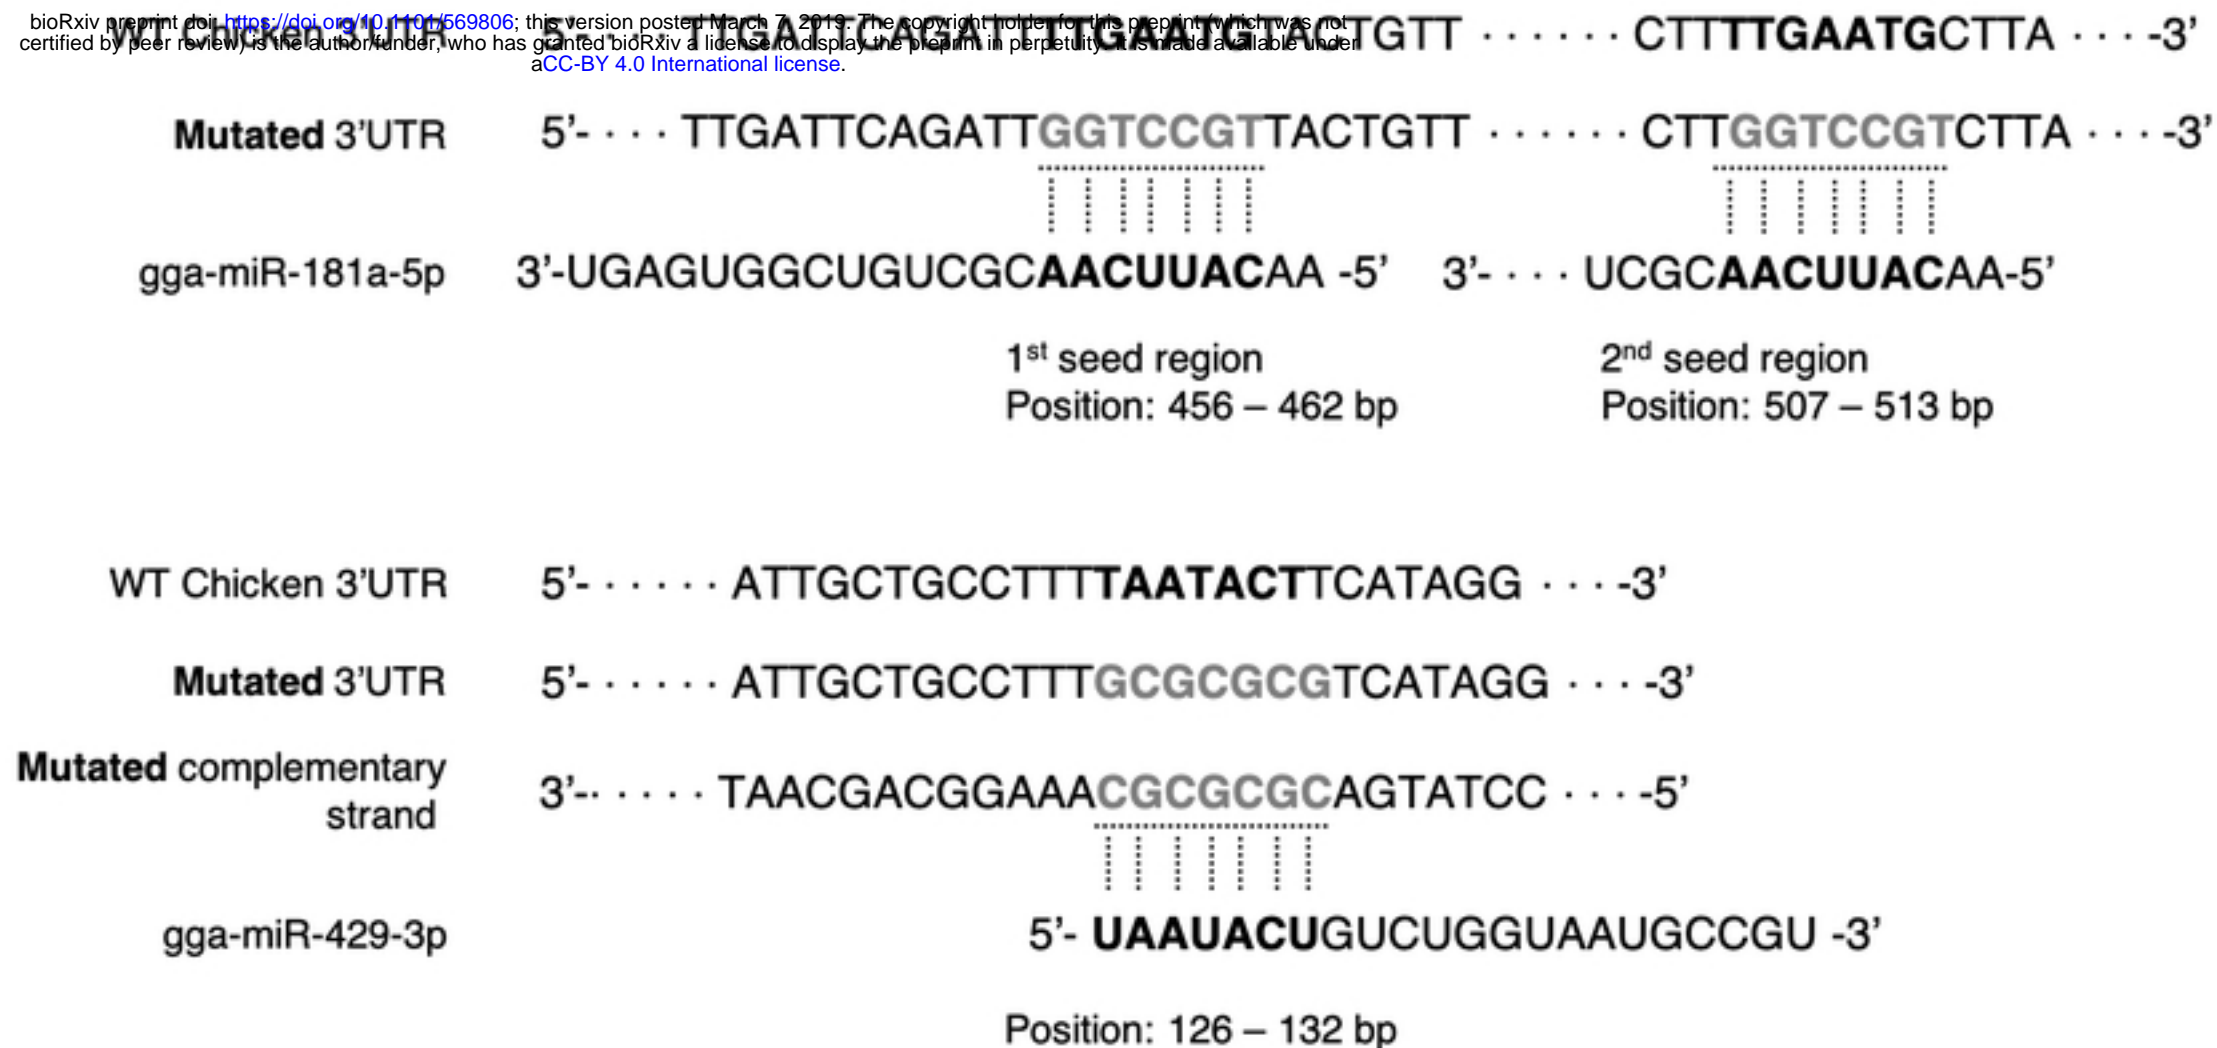**B**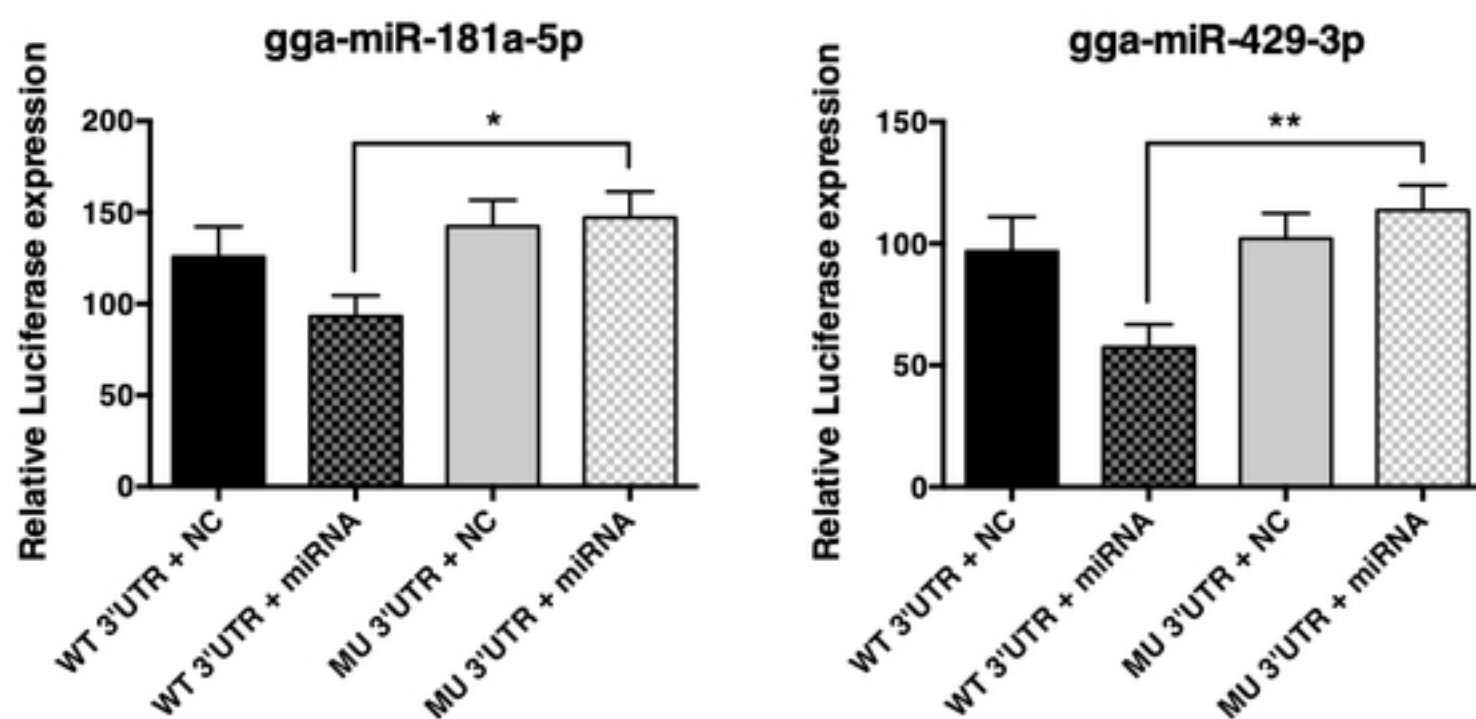

Fig 6

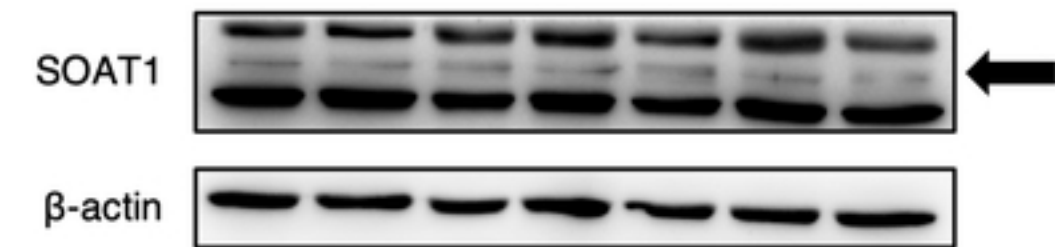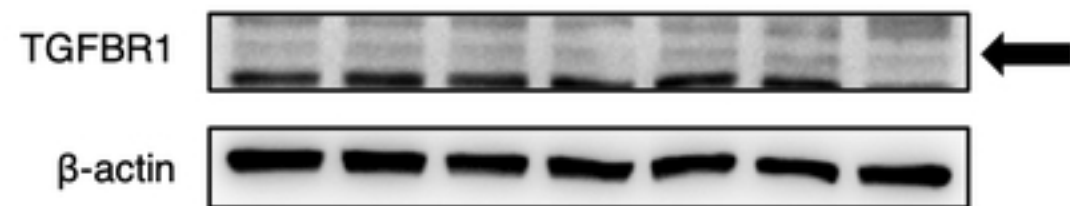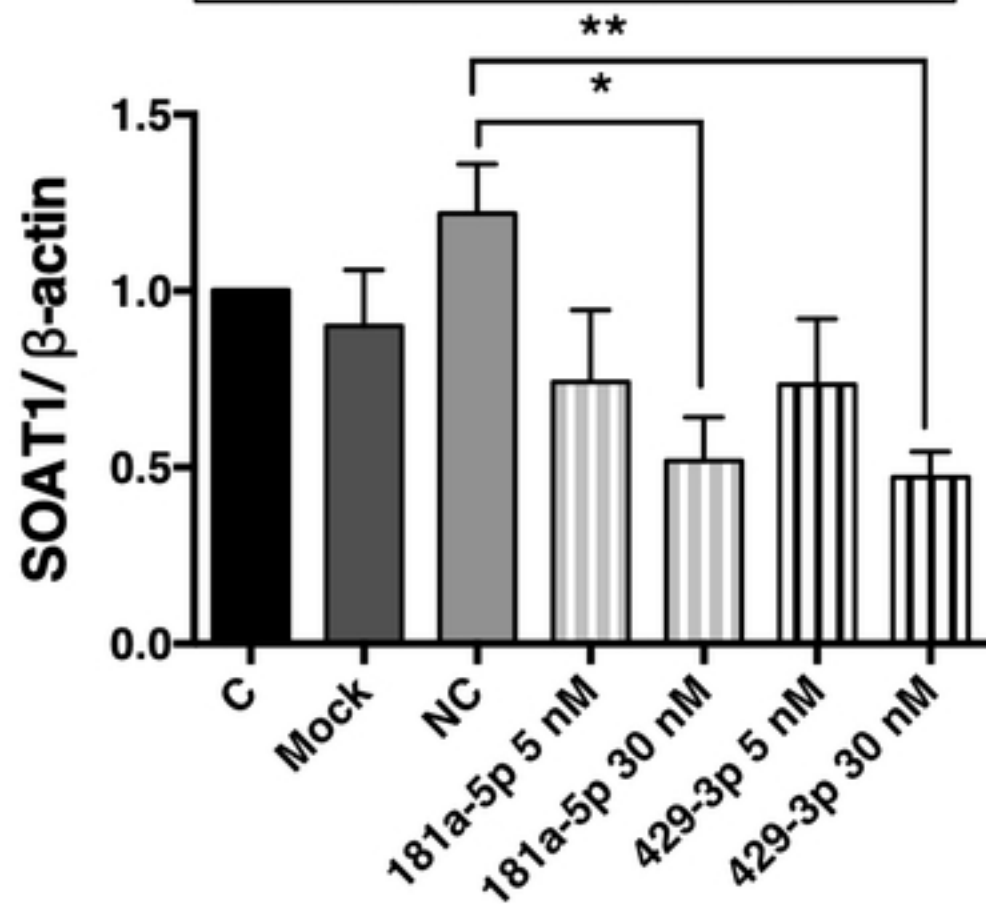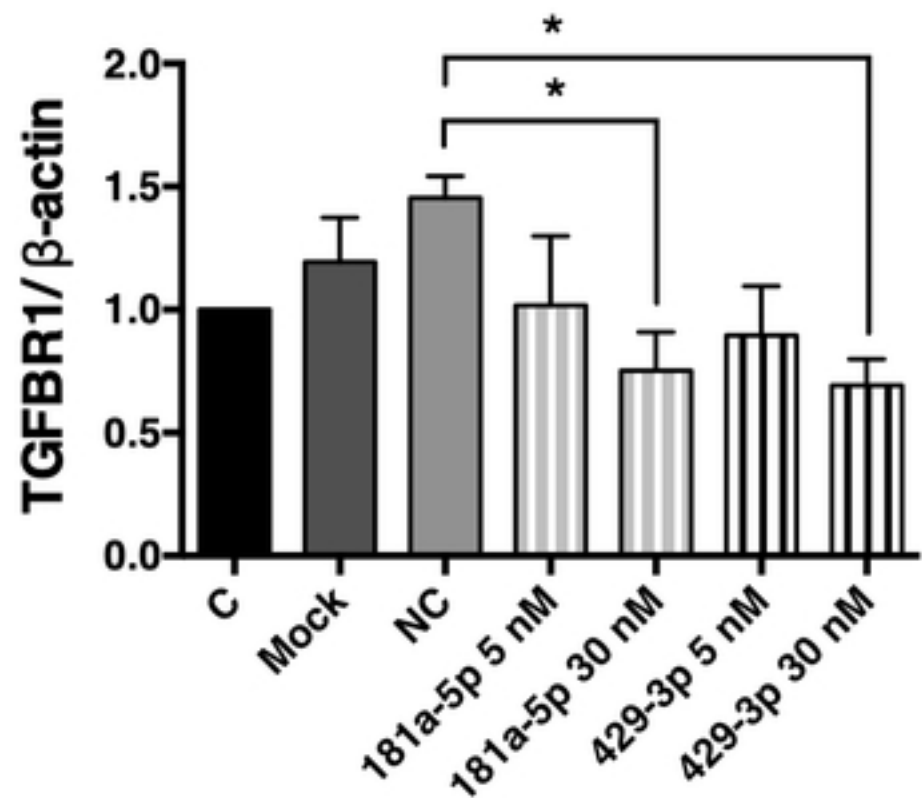

Fig 7

# TGFβ signaling pathway-Hypothesis

## Activation

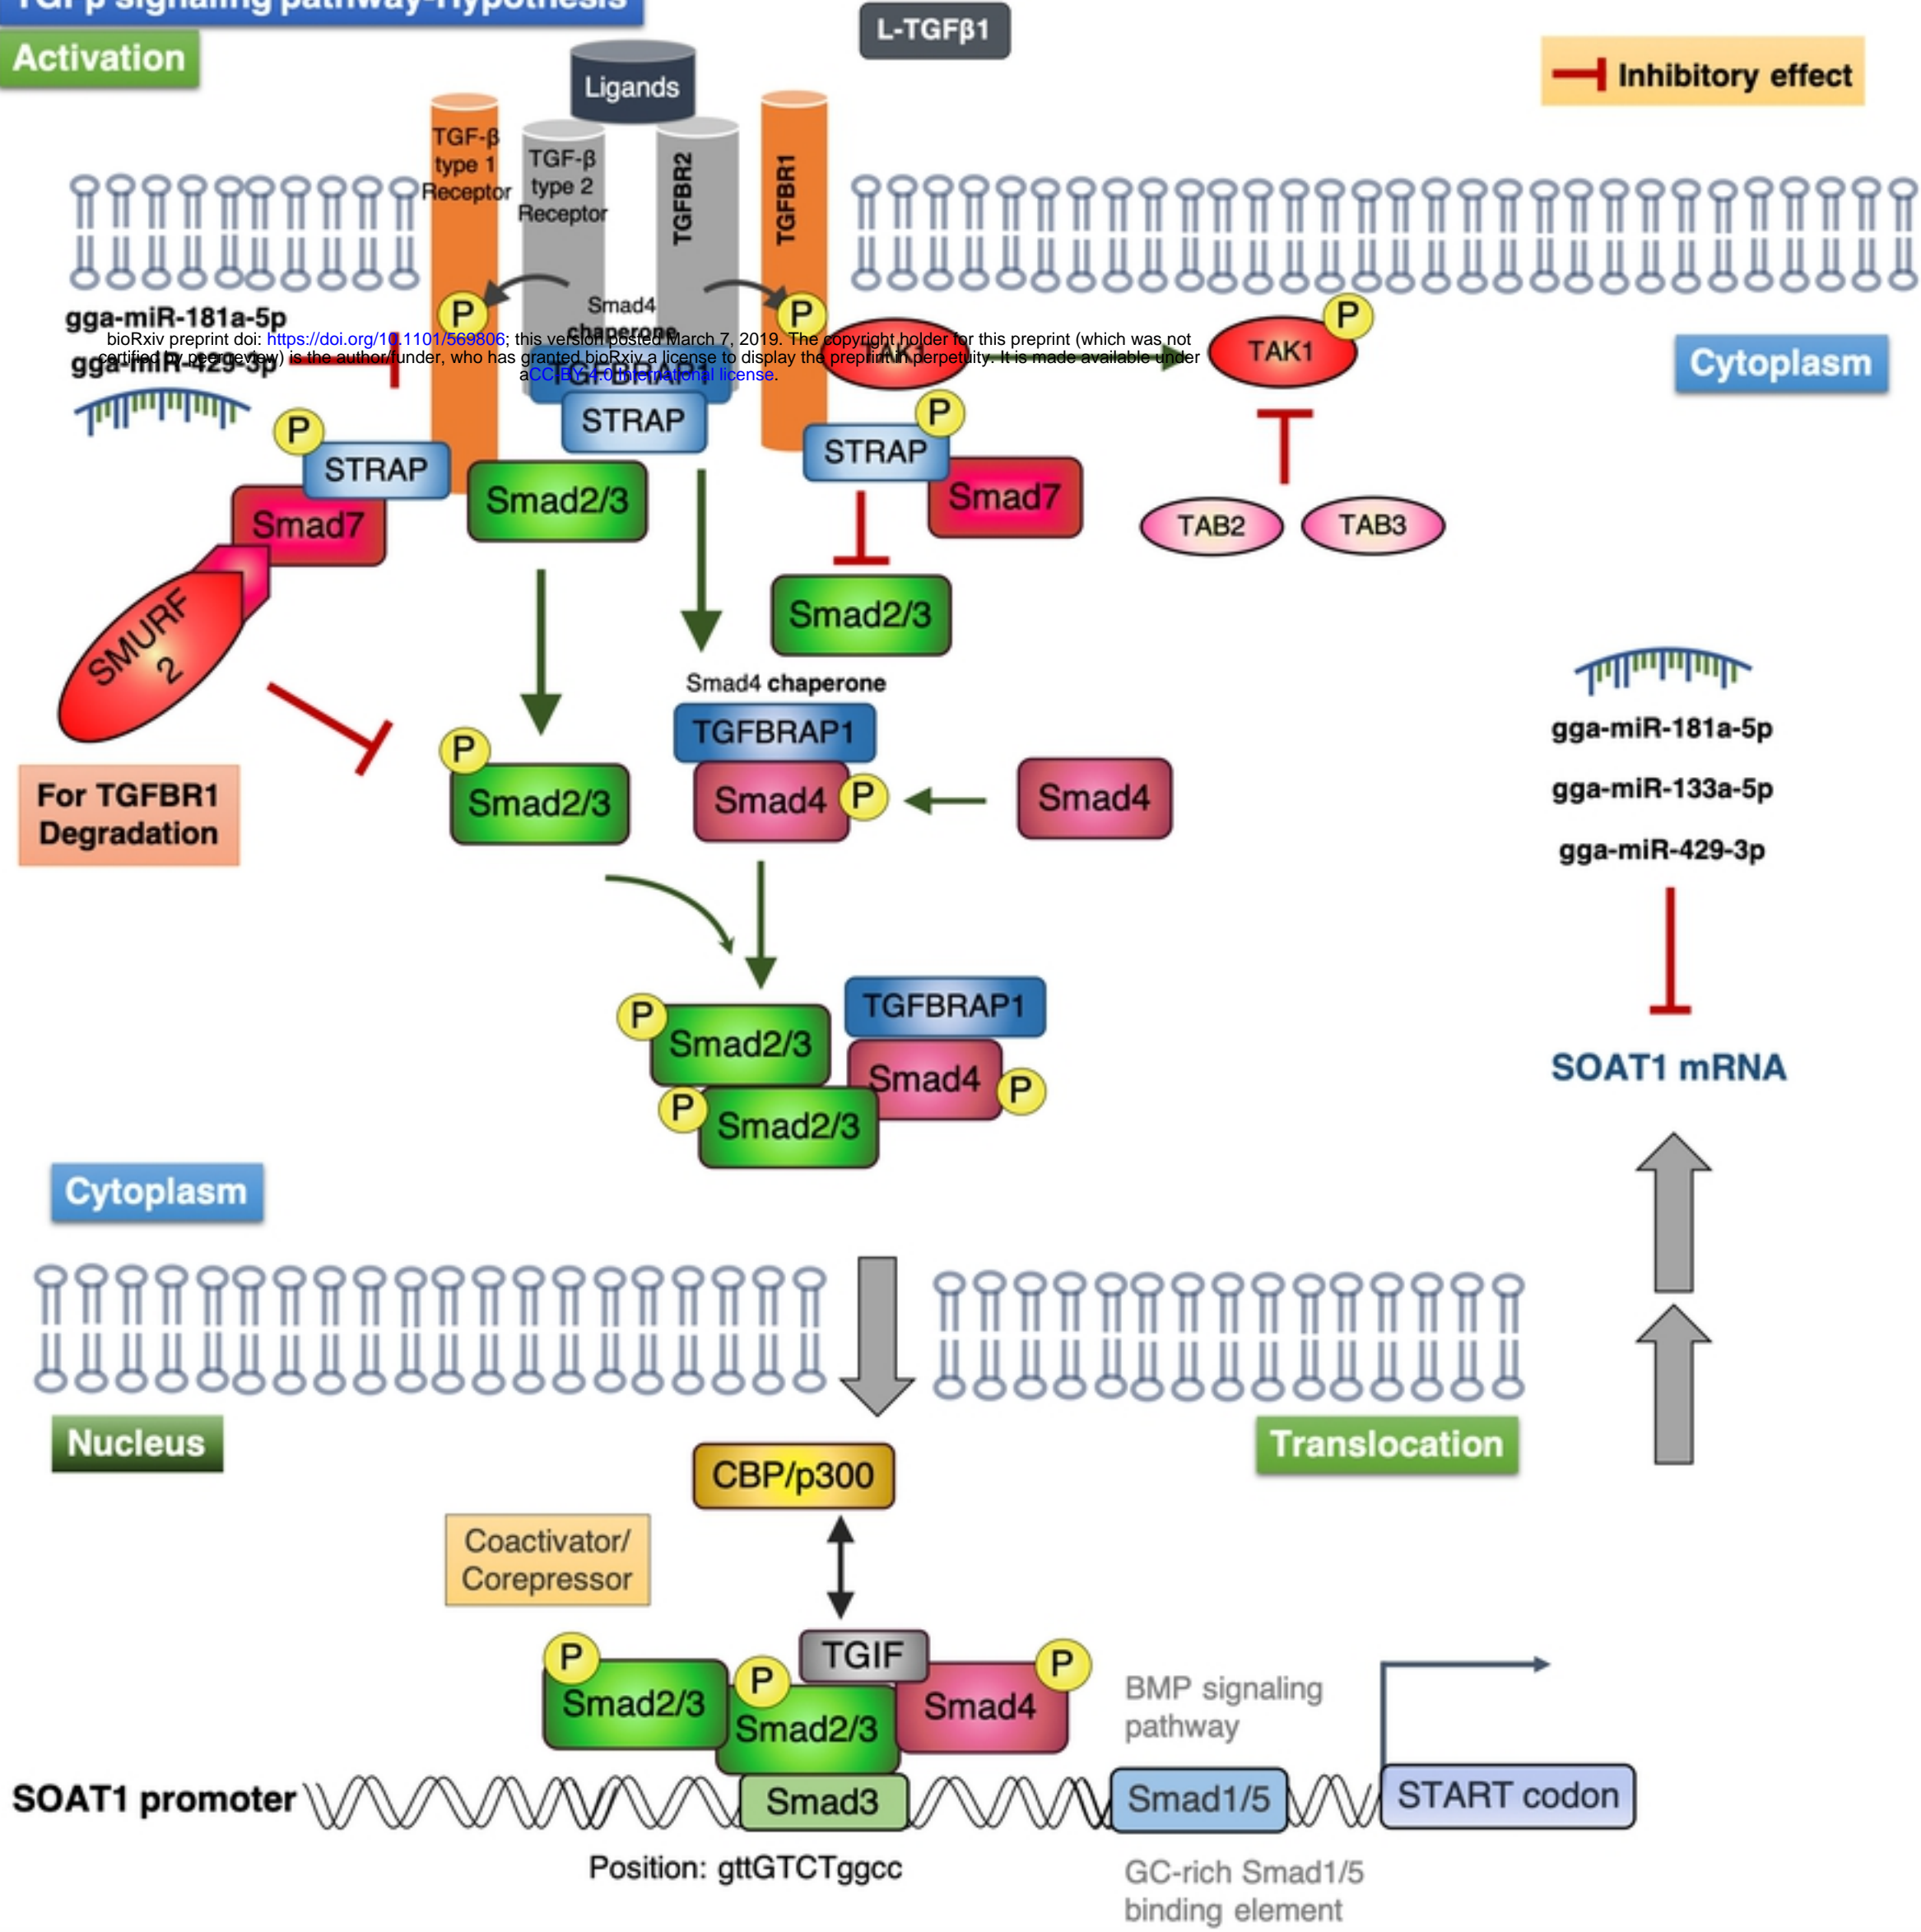

Fig 8
